# Supplementary material
Source: PubMed Central journal article supplement (PMC6648882)
Supplement: ao8b03496_si_001.pdf [file ao8b03496_si_001.pdf]

**Exploring the Role of Consecutive Addition of Nitrogen Atoms on Stability and Reactivity  
of Hydrogen Bonded Azine-Water Complexes**

**Neha Chopra,\*† Geetanjali Chopra† and Damanjit Kaur,†**

†Department of Chemistry, Guru Nanak Dev University, Amritsar 143005, India

Submitted to

ACS Omega

\*Corresponding E-mail address: [nehaomnamah@gmail.com](mailto:nehaomnamah@gmail.com)

**Table S1:** MEP parameters  $V_{\max}$  (the most positive potential) and  $V_{\min}$  (the most negative potential) of azines (in kcal/mol).

| <b>AZINES</b>  | <b><math>V_{\max}</math></b> | <b><math>V_{\min}</math></b> |
|----------------|------------------------------|------------------------------|
| <b>PY</b>      | +25.28                       | -43.37                       |
| <b>DZ12</b>    | +31.78                       | -41.46                       |
| <b>DZ13</b>    | +27.76                       | -33.42                       |
| <b>DZ14</b>    | +23.94                       | -30.70                       |
| <b>TZ123</b>   | +38.42                       | -38.67                       |
| <b>TZ124</b>   | +33.90                       | -35.11                       |
| <b>TZ135</b>   | +27.42                       | -27.74                       |
| <b>TTZ1234</b> | +43.80                       | -32.29                       |
| <b>TTZ1235</b> | +35.87                       | -29.18                       |
| <b>TTZ1245</b> | +32.84                       | -24.39                       |
| <b>PZ</b>      | +43.98                       | -24.32                       |
| <b>HZ</b>      | +37.09                       | -11.62                       |

### Type WIII

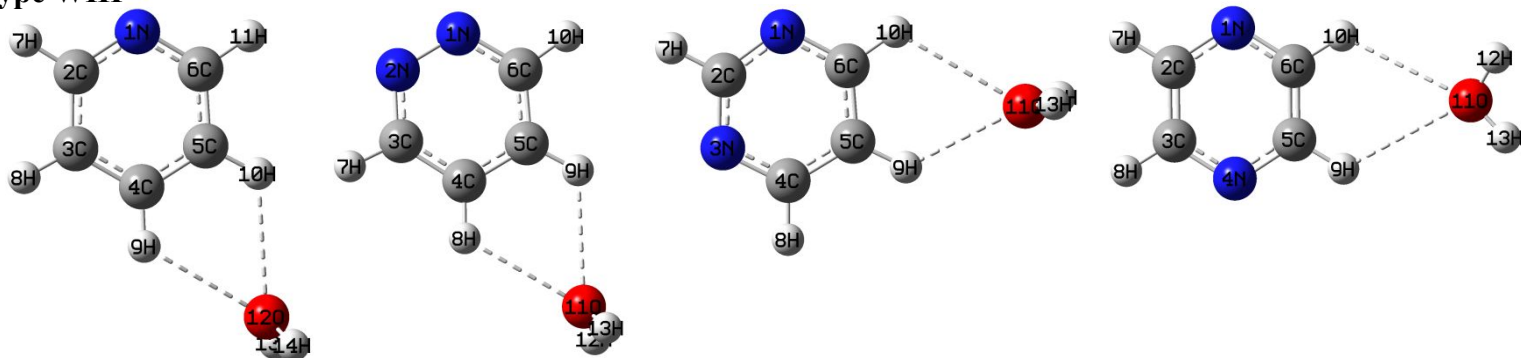

PY-WIII

DZ12-WIII

DZ13-WIII

DZ14-WIII

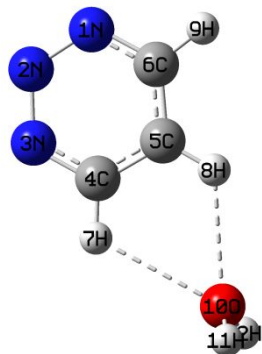

TZ123-WIII

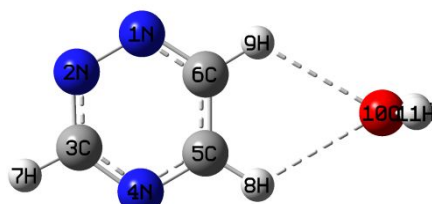

TZ124-WIII

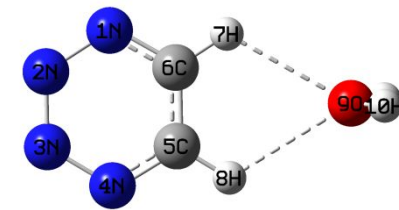

TTZ1234-WIII

### Type WIV

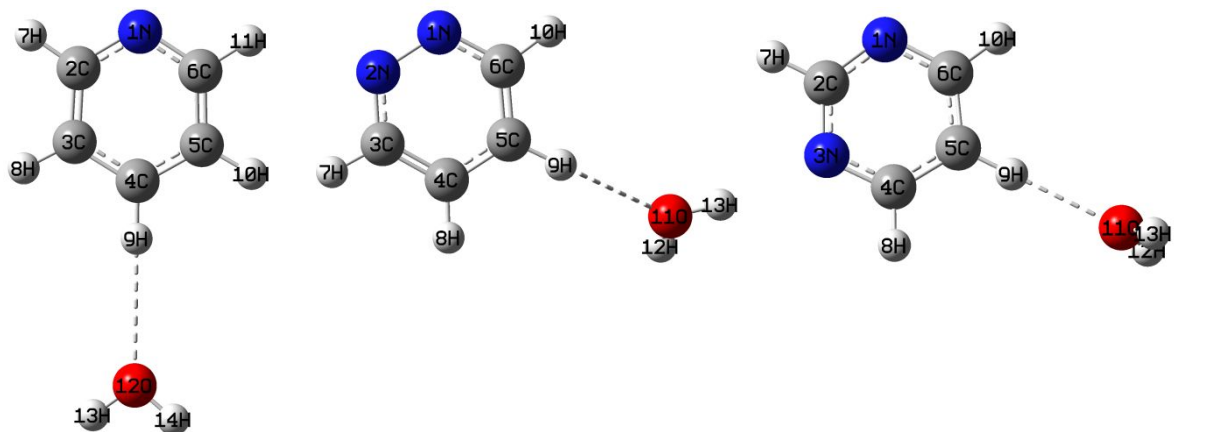

PY-WIV

DZ12-WIV

DZ13-WIV

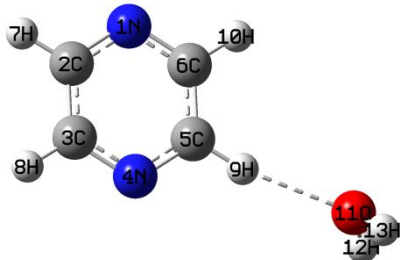

DZ14-WIV

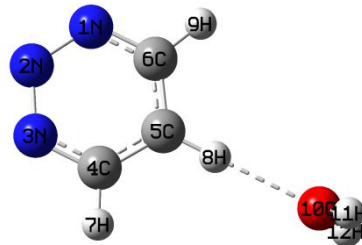

TZ123-WIV

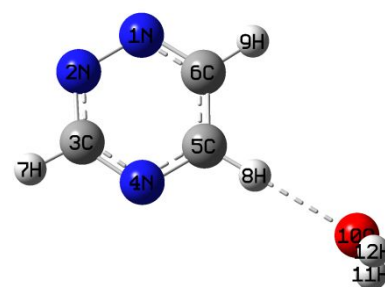

TZ124-WIV

**Figure S1:** Optimized geometries of 1:1 hydrogen bonded complexes of azines with water at MP2/aug-cc-pVDZ level (type WIII & WIV).

**Table S2:** Second order delocalization energies  $E^{(2)}$  (in kcal/mol) associated with orbital interactions at L1 and L2 levels, atomic charges (in au) and amount of charge transfer from azines to water (CT in e), MEP parameters  $V'_{\min}$  and  $\Delta V_{\min}$  (in kcal/mol) in complexes of azine with water at L1 level.

| Complexes           | Orbital Interactions                       | $E^{(2)}$    |              | Atomic Charges     |               | CT     | $V'_{\min}$ | $\Delta V_{\min}$ |
|---------------------|--------------------------------------------|--------------|--------------|--------------------|---------------|--------|-------------|-------------------|
|                     |                                            | L1           | L2           |                    |               |        |             |                   |
| <b>PY-WI</b>        | $n_{N1} \rightarrow \sigma^*_{O13-H12}$    | 14.12        | 12.35        | $q_{N1}(q_{H12})$  | -0.595(0.518) | +0.029 | -14.10      | +29.27            |
| <b>TZ123-WI</b>     | $^a n_{N2} \rightarrow n^*_{H10}$          | <b>10.45</b> | <b>11.45</b> | $q_{N2}(q_{H10})$  | -0.022(0.508) | +0.022 | -14.62      | +24.05            |
| <b>TTZ1234-WI</b>   | $n_{N3} \rightarrow \sigma^*_{O10-H9}$     | 6.46         | 4.73         | $q_{N3}(q_{H9})$   | -0.066(0.506) | +0.016 | -9.89       | +22.40            |
| <b>TTZ1235-WI</b>   | $n_{N2} \rightarrow \sigma^*_{O10-H9}$     | 6.69         | 4.96         | $q_{N2}(q_{H9})$   | -0.048(0.503) | +0.010 | -9.45       | +19.73            |
| <b>PZ-WI</b>        | $n_{N2} \rightarrow \sigma^*_{O9-H8}$      | 5.33         | 4.49         | $q_{N2}(q_{H8})$   | -0.046(0.500) | +0.008 | -8.68       | +15.64            |
| <b>HZ-WI</b>        | $n_{N4} \rightarrow \sigma^*_{O8-H7}$      | 2.74         | 1.89         | $q_{N4}(q_{H10})$  | -0.024(0.495) | +0.008 | -5.59       | +6.03             |
| <b>PY-WII</b>       | $n_{N1} \rightarrow \sigma^*_{O13-H12}$    | 11.62        | 11.44        | $q_{N1}(q_{H12})$  | -0.596(0.517) | +0.016 | -21.71      | +21.66            |
|                     | $n_{(1)O13} \rightarrow \sigma^*_{C6-H11}$ | 0.11         | 0.12         | $q_{O13}(q_{H11})$ | -1.009(0.220) |        |             |                   |
| <b>DZ12-WII</b>     | $n_{N1} \rightarrow \sigma^*_{O12-H11}$    | 10.66        | 10.32        | $q_{N2}(q_{H11})$  | -0.315(0.515) | +0.015 | -19.86      | +21.60            |
|                     | $n_{(1)O12} \rightarrow \sigma^*_{C6-H10}$ | 0.20         | 0.19         | $q_{O12}(q_{H10})$ | -1.009(0.215) |        |             |                   |
| <b>DZ13-WII</b>     | $n_{N1} \rightarrow \sigma^*_{O12-H11}$    | 9.36         | 8.33         | $q_{N1}(q_{H11})$  | -0.646(0.513) | +0.012 | -13.59      | +19.83            |
|                     | $n_{(1)O12} \rightarrow \sigma^*_{C6-H10}$ | 0.22         | 0.21         | $q_{O12}(q_{H9})$  | -1.006(0.226) |        |             |                   |
| <b>DZ14-WII</b>     | $^a n_{N1} \rightarrow n^*_{H11}$          | <b>12.80</b> | <b>12.93</b> | $q_{N1}(q_{H11})$  | -0.531(0.512) | +0.012 | -10.80      | +19.90            |
|                     | $n_{(1)O13} \rightarrow \sigma^*_{C6-H11}$ | 0.19         | 0.20         | $q_{O13}(q_{H11})$ | -1.004(0.229) |        |             |                   |
| <b>TZ123-WII</b>    | $^a n_{N1} \rightarrow n^*_{H10}$          | <b>10.11</b> | <b>10.35</b> | $q_{N1}(q_{H10})$  | -0.350(0.511) | +0.009 | -35.96      | +2.70             |
|                     | $n_{(1)O11} \rightarrow \sigma^*_{C6-H9}$  | 0.46         | 0.39         | $q_{O11}(q_{H9})$  | -1.005(0.240) |        |             |                   |
| <b>TZ124-WII</b>    | $n_{N1} \rightarrow \sigma^*_{O10-H11}$    | 8.30         | 7.39         | $q_{N2}(q_{H10})$  | -0.369(0.511) | +0.011 | -19.16      | +15.95            |
|                     | $n_{(1)O11} \rightarrow \sigma^*_{C6-H9}$  | 0.23         | 0.22         | $q_{O11}(q_{H9})$  | -1.003(0.222) |        |             |                   |
| <b>TZ135-WII</b>    | $n_{N1} \rightarrow \sigma^*_{O11-H10}$    | 6.87         | 6.99         | $q_{N1}(q_{H10})$  | -0.688(0.512) | +0.008 | -7.83       | +19.91            |
|                     | $n_{(1)O11} \rightarrow \sigma^*_{C6-H9}$  | 0.33         | 0.31         | $q_{O11}(q_{H9})$  | -1.001(0.217) |        |             |                   |
| <b>TTZ1234-WII</b>  | $n_{N1} \rightarrow \sigma^*_{O9-H10}$     | 4.38         | 4.73         | $q_{N1}(q_{H10})$  | -0.291(0.510) | +0.003 | -31.58      | +0.71             |
|                     | $n_{(1)O9} \rightarrow \sigma^*_{C6-H7}$   | 1.10         | 0.41         | $q_{O9}(q_{H7})$   | -1.001(0.228) |        |             |                   |
| <b>TTZ1245-WII</b>  | $n_{N1} \rightarrow \sigma^*_{O10-H9}$     | 4.80         | 4.94         | $q_{N1}(q_{H9})$   | -0.283(0.507) | +0.004 | -20.10      | +4.29             |
|                     | $n_{(1)O10} \rightarrow \sigma^*_{C6-H8}$  | 0.69         | 0.49         | $q_{O10}(q_{H8})$  | -0.998(0.236) |        |             |                   |
| <b>TTZ1235-WII</b>  | $n_{N1} \rightarrow \sigma^*_{O10-H9}$     | 4.99         | 5.18         | $q_{N1}(q_{H9})$   | -0.399(0.510) | +0.005 | -27.10      | +2.10             |
|                     | $n_{(1)O10} \rightarrow \sigma^*_{C6-H8}$  | 0.65         | 0.30         | $q_{O10}(q_{H8})$  | -1.000(0.231) |        |             |                   |
| <b>PZ-WII</b>       | $n_{N1} \rightarrow \sigma^*_{O9-H8}$      | 2.14         | 2.37         | $q_{N1}(q_{H8})$   | -0.320(0.504) | +0.003 | -23.97      | +0.35             |
|                     | $n_{(1)O9} \rightarrow \sigma^*_{C6-H7}$   | 1.29         | 0.84         | $q_{O9}(q_{H7})$   | -0.995(0.244) |        |             |                   |
| <b>PY-WIII</b>      | $n_{(1)O12} \rightarrow \sigma^*_{C4-H9}$  | 0.50         | 0.52         | $q_{O12}(q_{H9})$  | -0.970(0.234) | -0.005 | -47.93      | -4.56             |
|                     | $n_{(2)O12} \rightarrow \sigma^*_{C4-H9}$  | 0.31         | 0.28         |                    |               |        |             |                   |
|                     | $n_{(1)O12} \rightarrow \sigma^*_{C5-H10}$ | 0.48         | 0.49         | $q_{O12}(q_{H10})$ | -0.970(0.234) |        |             |                   |
|                     | $n_{(2)O12} \rightarrow \sigma^*_{C5-H10}$ | 0.32         | 0.29         |                    |               |        |             |                   |
| <b>DZ12-WIII</b>    | $n_{(1)O11} \rightarrow \sigma^*_{C4-H8}$  | 0.34         | 0.33         | $q_{O11}(q_{H8})$  | -0.974(0.242) | -0.005 | -45.98      | -4.46             |
|                     | $n_{(2)O11} \rightarrow \sigma^*_{C4-H8}$  | 0.42         | 0.45         |                    |               |        |             |                   |
|                     | $n_{(1)O11} \rightarrow \sigma^*_{C5-H9}$  | 0.36         | 0.38         | $q_{O11}(q_{H9})$  | -0.974(0.242) |        |             |                   |
|                     | $n_{(2)O11} \rightarrow \sigma^*_{C5-H9}$  | 0.51         | 0.50         |                    |               |        |             |                   |
| <b>DZ13-WIII</b>    | $n_{(1)O11} \rightarrow \sigma^*_{C5-H9}$  | 1.29         | 0.20         | $q_{O11}(q_{H9})$  | -0.972(0.248) | -0.005 | -37.62      | -4.20             |
|                     | $n_{(2)O11} \rightarrow \sigma^*_{C5-H9}$  | 0.31         | 1.20         |                    |               |        |             |                   |
|                     | $n_{(1)O12} \rightarrow \sigma^*_{C6-H10}$ | 1.29         | 0.38         | $q_{O12}(q_{H10})$ | -1.006(0.226) |        |             |                   |
|                     | $n_{(2)O12} \rightarrow \sigma^*_{C6-H10}$ | 0.31         | 0.29         |                    |               |        |             |                   |
| <b>DZ14-WIII</b>    | $n_{(1)O11} \rightarrow \sigma^*_{C2-H7}$  | 0.38         | 0.35         | $q_{O11}(q_{H7})$  | -0.977(0.220) | -0.005 | -35.67      | -4.97             |
|                     | $n_{(2)O11} \rightarrow \sigma^*_{C2-H7}$  | 0.62         | 0.60         |                    |               |        |             |                   |
|                     | $n_{(1)O11} \rightarrow \sigma^*_{C3-H8}$  | 0.48         | 0.41         | $q_{O11}(q_{H8})$  | -0.977(0.220) |        |             |                   |
|                     | $n_{(2)O11} \rightarrow \sigma^*_{C3-H8}$  | 0.64         | 0.59         |                    |               |        |             |                   |
| <b>TZ123-WIII</b>   | $n_{(1)O10} \rightarrow \sigma^*_{C4-H7}$  | 0.11         | 0.05         | $q_{O10}(q_{H7})$  | -0.977(0.227) | -0.005 | -39.82      | -1.15             |
|                     | $n_{(2)O10} \rightarrow \sigma^*_{C4-H7}$  | 0.52         | 0.50         |                    |               |        |             |                   |
|                     | $n_{(1)O10} \rightarrow \sigma^*_{C5-H8}$  | 0.85         | 0.78         | $q_{O10}(q_{H8})$  | -0.977(0.253) |        |             |                   |
|                     | $n_{(2)O10} \rightarrow \sigma^*_{C5-H8}$  | 0.52         | 0.50         |                    |               |        |             |                   |
| <b>TZ124-WIII</b>   | $n_{(1)O10} \rightarrow \sigma^*_{C5-H8}$  | 0.22         | 0.23         | $q_{O10}(q_{H8})$  | -0.976(0.227) | -0.005 | -38.01      | -2.90             |
|                     | $n_{(2)O10} \rightarrow \sigma^*_{C5-H8}$  | 0.68         | 0.62         |                    |               |        |             |                   |
|                     | $n_{(1)O10} \rightarrow \sigma^*_{C6-H9}$  | 0.59         | 0.55         | $q_{O10}(q_{H9})$  | -0.976(0.231) |        |             |                   |
|                     | $n_{(2)O10} \rightarrow \sigma^*_{C6-H9}$  | 0.49         | 0.45         |                    |               |        |             |                   |
| <b>TTZ1234-WIII</b> | $n_{(1)O9} \rightarrow \sigma^*_{C5-H8}$   | 0.40         | 0.38         | $q_{O9}(q_{H8})$   | -0.981(0.237) | -0.006 | -37.27      | -4.98             |
|                     | $n_{(2)O9} \rightarrow \sigma^*_{C5-H8}$   | 0.63         | 0.59         |                    |               |        |             |                   |

|                  |                                           |      |      |                   |               |        |        |       |
|------------------|-------------------------------------------|------|------|-------------------|---------------|--------|--------|-------|
|                  | $n(1)_{O9} \rightarrow \sigma^*_{C6-H7}$  | 0.48 | 0.42 | $q_{O9}(q_{H7})$  | -0.981(0.237) |        |        |       |
|                  | $n(2)_{O9} \rightarrow \sigma^*_{C6-H7}$  | 0.59 | 0.53 |                   |               |        |        |       |
| <b>PY-WIV</b>    | $n(1)_{O12} \rightarrow \sigma^*_{C4-H9}$ | 4.45 | 4.32 | $q_{O12}(q_{H9})$ | -0.974(0.243) | -0.007 | -46.62 | -3.25 |
| <b>DZ12-WIV</b>  | $n(1)_{O11} \rightarrow \sigma^*_{C5-H9}$ | 5.95 | 5.60 | $q_{O11}(q_{H9})$ | -1.020(0.253) | -0.009 | -45.84 | -4.38 |
| <b>DZ13-WIV</b>  | $n(1)_{O11} \rightarrow \sigma^*_{C5-H9}$ | 5.87 | 5.44 | $q_{O11}(q_{H9})$ | -1.010(0.248) | -0.008 | -39.84 | -6.42 |
| <b>DZ14-WIV</b>  | $n(1)_{O11} \rightarrow \sigma^*_{C5-H9}$ | 5.78 | 5.36 | $q_{O11}(q_{H9})$ | -1.005(0.263) | -0.008 | -37.20 | -6.50 |
| <b>TZ123-WIV</b> | $n(1)_{O10} \rightarrow \sigma^*_{C5-H8}$ | 6.71 | 6.42 | $q_{O10}(q_{H8})$ | -1.014(0.288) | -0.010 | -45.84 | -7.17 |
| <b>TZ124-WIV</b> | $n(1)_{O10} \rightarrow \sigma^*_{C5-H8}$ | 6.80 | 5.52 | $q_{O10}(q_{H8})$ | -1.011(0.271) | -0.010 | -42.03 | -6.92 |

<sup>a</sup> The orbital interaction  $n_N \rightarrow n^*_H$  indicate the transfer of lone pair electrons on nitrogen atom to hydrogen atom in the complexes.

## S1. Charge transfer and atomic charge analysis

NBO has been used to quantify the extent of charge transfer that is being transferred from one monomeric unit to another during the formation of complex. Table S2 illustrates the values of charge transfer (CT) from azines to water for the complexes under study at wB97XD/aug-cc-pVDZ level. The CT in **WI** complexes is from azine to water as indicated by positive CT values. The CT values of **WII** complexes involve HBs with both azine and water acting as HB donor as well as acceptor, therefore CT occurs from azine to water and vice-versa. The CT values of these complexes being positive indicate that CT from azine to water is higher than that from water to azine, so the direction of net CT is from azine to water. The CT is indicated to be the highest in type **WI** complexes followed by type **WII** complexes. The magnitude of CT in type **WI** and **WII** complexes decreases with increase in the number of N atoms in the ring. The magnitude of CT in type **WIII** and **WIV** complexes is from water to azine as suggested by their negative CT values. The CT in type **WIII** complexes is significantly lower in comparison to that in type **WIV** complexes despite the fact that there are two C-H $\cdots$ O<sub>w</sub> interactions in former complexes whereas in case of type **WIV** complexes there is only single C-H $\cdots$ O<sub>w</sub> interaction. The reason for such observation is explored on the basis of contraction of C-H bond of azines. In type **WIII** complexes, both the C-H bonds of azine are contracted but this contraction is considerably smaller than that occurring in type **WIV** complexes. Thus higher CT in type **WIV** complexes is consistent with larger contraction of C-H occurred during complex formation. The variation of CT in type **WIV** complexes suggests that it is favored by increase in number of N atoms.

NBO analysis is a reliable tool to derive information about the atomic charges which reflect the relative importance of electrostatic interactions associated with the complexes. The values of atomic charges of atoms forming HB evaluated at L1 level utilizing NBO analysis are presented in table S2. The atomic charges reflect that hydrogen nuclei forming HBs are deshielded upon HB formation. A large variation (-0.022 to -0.688 au) is observed in the atomic

charge values of azine nitrogen atoms that are involved in complex formation. In spite of low polarity of C-H bond, electrostatic interaction play a significant role in the unconventional C-H $\cdots$ O<sub>w</sub> HB interaction as there is high electron density present on the oxygen atom (-0.974 to -1.009 au).

## S2. Description of topological parameters

AIM provides an elegant approach to study the concept of hydrogen bonding interactions. Topologically stable critical points available in the complexes are designated as (3, -1) called bond critical points (bcps) and (3, +1) called ring critical points (rcps). The topological parameters such as electron density ( $\rho_c$ ), its Laplacian ( $\nabla^2\rho_c$ ), the total electron energy density ( $H_c$ ) and its two components potential electron energy density ( $V_c$ ) and kinetic electron energy density ( $G_c$ ), calculated at the (3, -1) and (3, +1) critical points, are summarized in table S3. The values of the Laplacian  $\nabla^2\rho_c$ , the energy density  $H_c$ , and the balance between the kinetic electron energy density and the potential electron energy density  $-G_c/V_c$  display the nature of the interaction.  $\nabla^2\rho_c > 0$  indicates the interaction is of closed-shell type (ionic interaction, van der Waals forces or HBs).<sup>1, 2</sup>  $\nabla^2\rho_c < 0$  implies that there is a shared interaction as in a covalent bond. The positive  $\nabla^2\rho_c$  and the negative  $H_c$  mean that the interaction is partly covalent in nature. The values of  $-G_c/V_c$  also reveal information about the nature of the bonding interaction. If  $-G_c/V_c > 1$ , then the interaction is noncovalent; if  $-G_c/V_c$  value ranges between 0.5 and 1, then the interaction is partly covalent in nature.<sup>3</sup>



Type WIII

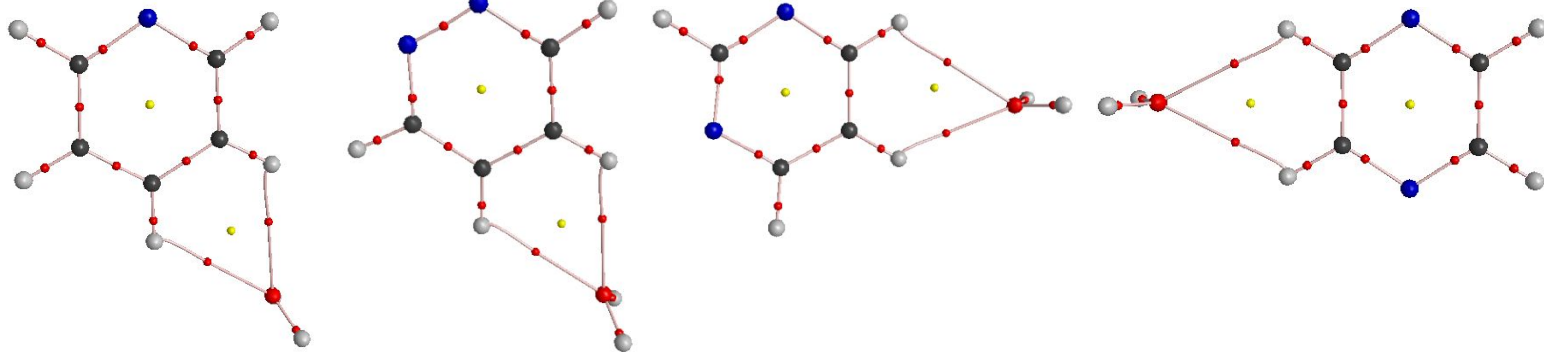

PY-WIII

DZ12-WIII

DZ13-WIII

DZ14-WIII

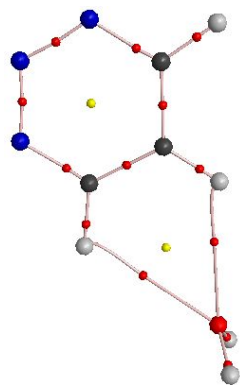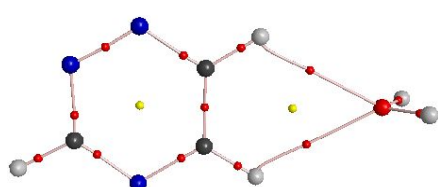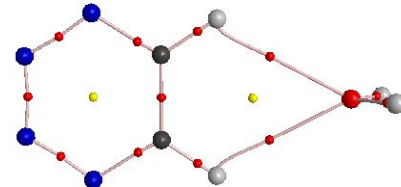

TZ123-WIII

TZ124-WIII

TTZ1234-WIII

Type WIV

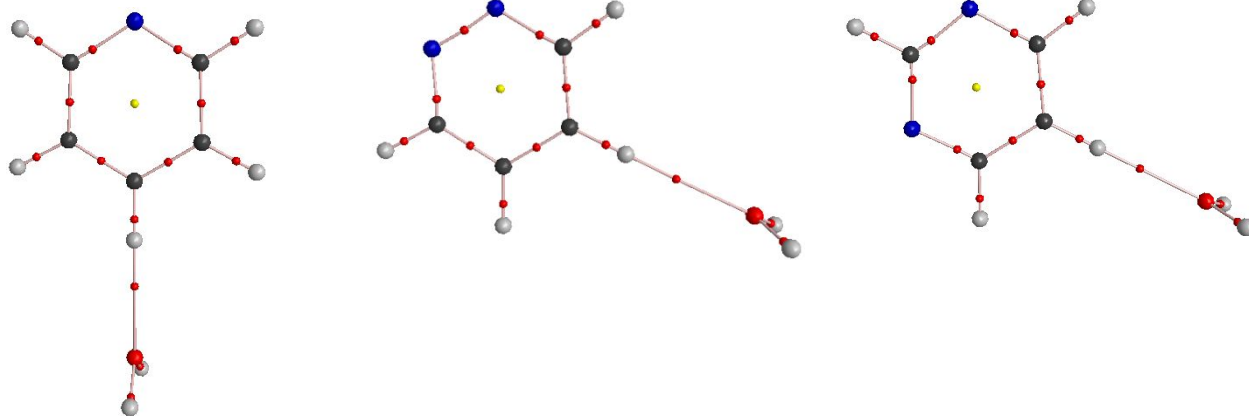

PY-WIV

DZ12-WIV

DZ13-WIV

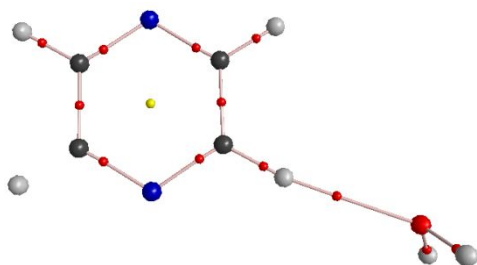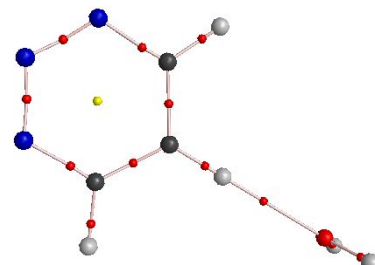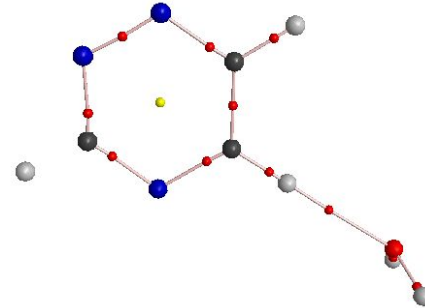

DZ14-WIV

TZ123-WIV

TZ124-WIV

**Figure S2:** AIM molecular graphs of complexes of azines with water at MP2/aug-cc-pVDZ level (Type WIII & WIV). Small red balls indicate bond critical points and small yellow balls indicate ring critical points.

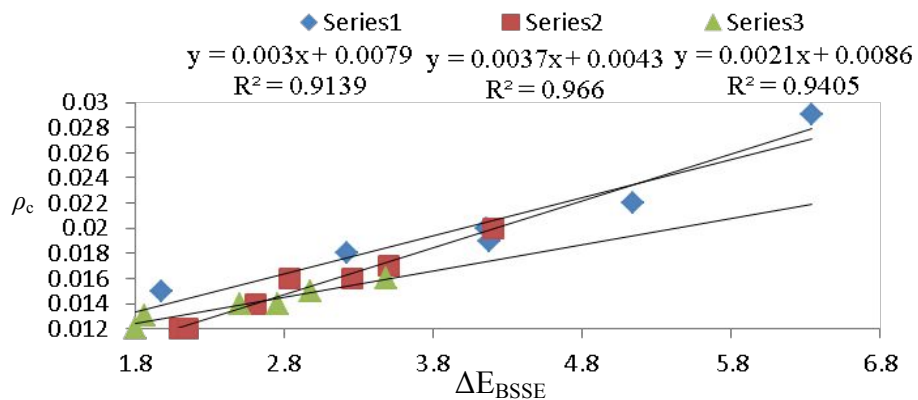

**Figure S3:** A plot of the relation between stabilization energy ( $\Delta E_{\text{BSSE}}$  in kcal/mol) and  $\rho_c$  (au) at MP2/aug-cc-pVDZ level.

**series 1** implies the complexes involving single  $\text{N}\cdots\text{H}-\text{O}_w$  HB interaction.

**series 2** implies the complexes involving two HBs  $\text{C}-\text{H}\cdots\text{O}_w$  forming bifurcated structure.

**series 3** results from single  $\text{C}-\text{H}\cdots\text{O}_w$  hydrogen bonded complexes.

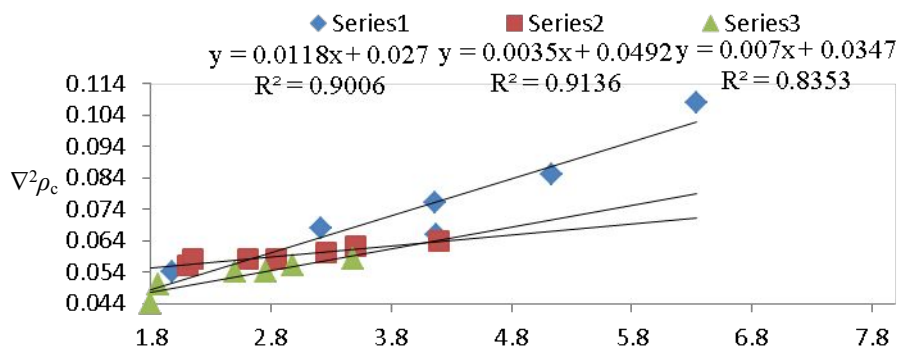

**Figure S4:** A plot of the relation between stabilization energy ( $\Delta E_{\text{BSSE}}$  in kcal/mol) and  $\nabla^2\rho_c$  (au) at MP2/aug-cc-pVDZ level.

**series 1** implies the complexes involving single  $\text{N}\cdots\text{H}-\text{O}_w$  HB interaction.

**series 2** implies the complexes involving two HBs  $\text{C}-\text{H}\cdots\text{O}_w$  forming bifurcated structure.

**series 3** results from single  $\text{C}-\text{H}\cdots\text{O}_w$  hydrogen bonded complexes.

**Table S3:** The topological and energetic properties at the bond critical points (bcps) and the ring critical points (rcps) for the complexes of azines with water evaluated at MP2/aug-cc-pVDZ level. (All the values are in au)

| COMPLEXES   | HBs      | CP                   | $\rho_c$ | $\nabla^2 \rho_c$ | $G_c$  | $V_c$  | $H_c$  | $-G_c/V_c$ |      |
|-------------|----------|----------------------|----------|-------------------|--------|--------|--------|------------|------|
| PY-WI       | H13...N1 | (3, -1)              | 0.029    | 0.108             | 0.023  | -0.020 | -0.003 | 1.15       |      |
|             |          | (3, +1)              | 0.022    | 0.170             | 0.034  | -0.026 | -0.008 | 1.31       |      |
| TZ123-WI    | H10...N2 | (3, -1)              | 0.022    | 0.085             | 0.018  | -0.014 | 0.004  | 1.28       |      |
|             |          | (3, +1)              | 0.024    | 0.187             | 0.039  | -0.030 | 0.009  | 1.30       |      |
| TTZ1234-WI  | H9...N3  | (3, -1)              | 0.019    | 0.066             | 0.015  | -0.012 | 0.003  | 1.25       |      |
|             |          | (3, +1)              | 0.025    | 0.196             | 0.040  | -0.032 | 0.008  | 1.25       |      |
| TTZ1235-WI  | H9...N2  | (3, -1)              | 0.020    | 0.076             | 0.016  | -0.013 | 0.003  | 1.23       |      |
|             |          | (3, +1)              | 0.027    | 0.208             | 0.044  | -0.036 | 0.008  | 1.22       |      |
| PZ-WI       | H8...N2  | (3, -1)              | 0.018    | 0.068             | 0.014  | -0.011 | 0.003  | 1.27       |      |
|             |          | (3, +1)              | 0.026    | 0.204             | 0.043  | -0.034 | 0.009  | 1.26       |      |
| HZ-WI       | H7...N4  | (3, -1)              | 0.015    | 0.054             | 0.011  | -0.008 | 0.003  | 1.38       |      |
|             |          | (3, +1)              | 0.029    | 0.242             | 0.050  | -0.040 | 0.010  | 1.25       |      |
| PY-WII      | H12...N1 | (3, -1)              | 0.027    | 0.102             | 0.022  | -0.019 | 0.003  | 1.15       |      |
|             |          | (3, +1)              | 0.022    | 0.170             | 0.034  | -0.026 | 0.008  | 1.31       |      |
| DZ12-WII    | H11...N2 | (3, -1)              | 0.026    | 0.100             | 0.022  | -0.018 | 0.004  | 1.22       |      |
|             |          | (3, +1)              | 0.023    | 0.177             | 0.036  | -0.028 | 0.008  | 1.29       |      |
| DZ13-WII    | H11...N1 | (3, -1)              | 0.025    | 0.094             | 0.020  | -0.017 | 0.003  | 1.18       |      |
|             |          | (3, +1)              | 0.025    | 0.186             | 0.038  | -0.030 | 0.008  | 1.27       |      |
| DZ14-WII    | H11...N1 | (3, -1)              | 0.025    | 0.093             | 0.020  | -0.017 | 0.003  | 1.18       |      |
|             |          | (3, +1)              | 0.024    | 0.185             | 0.038  | -0.030 | 0.008  | 1.27       |      |
| TZ123-WII   | H10...N1 | (3, -1)              | 0.023    | 0.086             | 0.019  | -0.016 | 0.003  | 1.19       |      |
|             |          | H9...O11             | (3, -1)  | 0.008             | 0.039  | 0.008  | -0.006 | 0.002      | 1.33 |
|             |          |                      | (3, +1)  | 0.024             | 0.187  | 0.038  | -0.030 | 0.008      | 1.27 |
| TZ124-WII   | H10...N1 | (3, +1) <sup>a</sup> | 0.008    | 0.045             | 0.009  | -0.007 | 0.002  | 1.29       |      |
|             |          | (3, -1)              | 0.024    | 0.089             | 0.019  | -0.016 | 0.003  | 1.19       |      |
|             |          | H9...O11             | (3, -1)  | 0.008             | 0.039  | 0.008  | -0.006 | 0.002      | 1.33 |
| (3, +1)     | 0.025    |                      | 0.162    | 0.041             | -0.033 | 0.008  | 1.24   |            |      |
| TZ135-WII   | H10...N1 | (3, +1) <sup>a</sup> | 0.008    | 0.043             | 0.009  | -0.006 | 0.003  | 1.50       |      |
|             |          | (3, -1)              | 0.022    | 0.081             | 0.018  | -0.015 | 0.003  | 1.20       |      |
|             |          | (3, +1)              | 0.028    | 0.205             | 0.043  | -0.035 | 0.008  | 1.23       |      |
| TTZ1234-WII | H10...N1 | (3, -1)              | 0.019    | 0.071             | 0.016  | -0.014 | 0.002  | 1.14       |      |
|             |          | H8...O11             | (3, -1)  | 0.007             | 0.037  | 0.010  | -0.009 | 0.001      | 1.11 |
|             |          |                      | (3, +1)  | 0.025             | 0.195  | 0.040  | -0.032 | 0.008      | 1.25 |
| TTZ1245-WII | H10...N1 | (3, +1) <sup>a</sup> | 0.009    | 0.055             | 0.011  | -0.008 | 0.003  | 1.38       |      |
|             |          | (3, -1)              | 0.020    | 0.073             | 0.016  | -0.014 | 0.002  | 1.14       |      |
|             |          | H8...O9              | (3, -1)  | 0.008             | 0.038  | 0.008  | -0.007 | 0.001      | 1.14 |
| (3, +1)     | 0.027    |                      | 0.202    | 0.043             | -0.035 | 0.008  | 1.23   |            |      |
|             |          | (3, +1) <sup>a</sup> | 0.008    | 0.046             | 0.009  | -0.007 | 0.002  | 1.29       |      |

|                     |           |                      |       |       |       |        |       |      |
|---------------------|-----------|----------------------|-------|-------|-------|--------|-------|------|
| <b>TTZ1235-WII</b>  | H10...N4  | (3, -1)              | 0.021 | 0.074 | 0.015 | -0.014 | 0.001 | 1.07 |
|                     | H8...O10  | (3, -1)              | 0.008 | 0.037 | 0.008 | -0.007 | 0.001 | 1.14 |
|                     |           | (3, +1)              | 0.029 | 0.210 | 0.044 | -0.036 | 0.008 | 1.22 |
|                     |           | (3, +1) <sup>a</sup> | 0.008 | 0.045 | 0.009 | 0.007  | 0.002 | 1.29 |
| <b>PZ-WII</b>       | H8...N1   | (3, -1)              | 0.015 | 0.055 | 0.013 | -0.012 | 0.001 | 1.08 |
|                     | H7...O9   | (3, -1)              | 0.011 | 0.044 | 0.010 | -0.009 | 0.001 | 1.11 |
|                     |           | (3, +1)              | 0.026 | 0.206 | 0.043 | -0.034 | 0.009 | 1.26 |
|                     |           | (3, +1) <sup>a</sup> | 0.008 | 0.049 | 0.010 | -0.007 | 0.003 | 1.43 |
| <b>PY-WIII</b>      | H9...O12  | (3, -1)              | 0.006 | 0.028 | 0.006 | -0.005 | 0.001 | 1.20 |
|                     | H10...O12 | (3, -1)              | 0.006 | 0.028 | 0.006 | -0.005 | 0.001 | 1.20 |
|                     |           | (3, +1)              | 0.022 | 0.170 | 0.034 | -0.026 | 0.008 | 1.31 |
|                     |           | (3, +1) <sup>a</sup> | 0.005 | 0.024 | 0.004 | -0.003 | 0.001 | 1.33 |
| <b>DZ12-WIII</b>    | H8...O11  | (3, -1)              | 0.008 | 0.029 | 0.006 | -0.005 | 0.001 | 1.20 |
|                     | H9...O11  | (3, -1)              | 0.008 | 0.029 | 0.006 | -0.005 | 0.001 | 1.20 |
|                     |           | (3, +1)              | 0.023 | 0.177 | 0.036 | -0.028 | 0.008 | 1.29 |
|                     |           | (3, +1) <sup>a</sup> | 0.005 | 0.026 | 0.005 | -0.004 | 0.001 | 1.25 |
| <b>DZ13-WIII</b>    | H9...O11  | (3, -1)              | 0.007 | 0.029 | 0.006 | -0.005 | 0.001 | 1.20 |
|                     | H10...O11 | (3, -1)              | 0.007 | 0.029 | 0.006 | -0.005 | 0.001 | 1.20 |
|                     |           | (3, +1)              | 0.025 | 0.186 | 0.039 | -0.031 | 0.008 | 1.26 |
|                     |           | (3, +1) <sup>a</sup> | 0.004 | 0.024 | 0.005 | -0.003 | 0.002 | 1.66 |
| <b>DZ14-WIII</b>    | H7...O11  | (3, -1)              | 0.006 | 0.029 | 0.006 | -0.005 | 0.001 | 1.20 |
|                     | H8...O11  | (3, -1)              | 0.006 | 0.029 | 0.006 | -0.005 | 0.001 | 1.20 |
|                     |           | (3, +1)              | 0.025 | 0.190 | 0.040 | -0.031 | 0.009 | 1.29 |
|                     |           | (3, +1) <sup>a</sup> | 0.005 | 0.028 | 0.005 | -0.004 | 0.001 | 1.25 |
| <b>TZ123-WIII</b>   | H9...O10  | (3, -1)              | 0.009 | 0.031 | 0.006 | -0.005 | 0.001 | 1.20 |
|                     | H8...O10  | (3, -1)              | 0.008 | 0.031 | 0.008 | -0.007 | 0.001 | 1.14 |
|                     |           | (3, +1)              | 0.024 | 0.187 | 0.038 | -0.030 | 0.008 | 1.27 |
|                     |           | (3, +1) <sup>a</sup> | 0.005 | 0.028 | 0.005 | -0.004 | 0.001 | 1.25 |
| <b>TZ124-WIII</b>   | H9...O10  | (3, -1)              | 0.008 | 0.030 | 0.007 | -0.006 | 0.001 | 1.17 |
|                     | H8...O10  | (3, -1)              | 0.008 | 0.030 | 0.007 | -0.006 | 0.001 | 1.17 |
|                     |           | (3, +1)              | 0.026 | 0.194 | 0.041 | -0.033 | 0.008 | 1.24 |
|                     |           | (3, +1) <sup>a</sup> | 0.005 | 0.028 | 0.005 | -0.004 | 0.001 | 1.25 |
| <b>TTZ1234-WIII</b> | H7...O9   | (3, -1)              | 0.010 | 0.032 | 0.007 | -0.006 | 0.001 | 1.17 |
|                     | H8...O9   | (3, -1)              | 0.010 | 0.032 | 0.007 | -0.006 | 0.001 | 1.17 |
|                     |           | (3, +1)              | 0.025 | 0.195 | 0.040 | -0.032 | 0.008 | 1.25 |
|                     |           | (3, +1) <sup>a</sup> | 0.006 | 0.030 | 0.006 | -0.004 | 0.002 | 1.50 |
| <b>PY-WIV</b>       | H9...O12  | (3, -1)              | 0.012 | 0.044 | 0.010 | -0.009 | 0.001 | 1.11 |
|                     |           | (3, +1)              | 0.022 | 0.174 | 0.035 | -0.026 | 0.009 | 1.35 |
| <b>DZ12-WIV</b>     | H9...O11  | (3, -1)              | 0.014 | 0.054 | 0.013 | -0.010 | 0.003 | 1.30 |
|                     |           | (3, +1)              | 0.023 | 0.177 | 0.036 | -0.028 | 0.008 | 1.29 |

|                  |          |         |       |       |       |        |       |      |
|------------------|----------|---------|-------|-------|-------|--------|-------|------|
| <b>DZ13-WIV</b>  | H9...O11 | (3, -1) | 0.014 | 0.054 | 0.013 | -0.012 | 0.001 | 1.08 |
|                  |          | (3, +1) | 0.024 | 0.186 | 0.038 | -0.030 | 0.008 | 1.27 |
| <b>DZ14-WIV</b>  | H9...O11 | (3, -1) | 0.013 | 0.051 | 0.012 | -0.012 | 0.000 | 1.00 |
|                  |          | (3, +1) | 0.024 | 0.185 | 0.038 | -0.030 | 0.008 | 1.27 |
| <b>TZ123-WIV</b> | H8...O10 | (3, -1) | 0.016 | 0.058 | 0.014 | -0.013 | 0.001 | 1.08 |
|                  |          | (3, +1) | 0.024 | 0.187 | 0.038 | -0.030 | 0.008 | 1.27 |
| <b>TZ124-WIV</b> | H8...O10 | (3, -1) | 0.015 | 0.056 | 0.014 | -0.013 | 0.001 | 1.08 |
|                  |          | (3, +1) | 0.026 | 0.194 | 0.041 | -0.033 | 0.008 | 1.24 |

---

(3, -1) indicate bcps; (3, +1)<sup>a</sup> indicate rcps in azines; (3, +1) indicate rcps in pseudo five-membered ring.

### S3. Analysis of $V_{\max}$ and $V_{\min}$

The study of molecular electrostatic potential (MEP) focuses to interpret and predict the electrophilic and nucleophilic regions present in the molecule. The high negative electrostatic potential associated with ring nitrogens makes these sites in azines attractive for electrophiles. The magnitude of  $V_{\min}$  is found to be decreased with increase in the number of nitrogens in the ring which points to the fact that conclude that nitrogen atoms compete for polarizable electronic charge, each get a small proportion of it (table S1). The strong positive electrostatic potential  $V_{\max}$  along the C-H bond vector of azine make these sites attractive for nucleophiles. The magnitude of  $V_{\max}$  is found to be increased with increase in the number of nitrogens in the ring (table S1). Higher  $V_{\min}$  and  $V_{\max}$  values are associated with DZ12, TZ123, TTZ1234 isomeric forms in which ring nitrogens are adjacent to each other.

It is to be anticipated from the most negative potential values of complexes,  $V'_{\min}$  (table S2) that upon complexation with water there is large decrease in negative lone pair potentials of ring nitrogen atoms in case of complexes involving single  $N \cdots H-O_w$  interaction whereas there is increase in the negative lone pair potential of ring nitrogens in case of complexes involving single  $C-H \cdots O_w$  interaction. The type **WI** and **WII** complexes have positive value of  $\Delta V_{\min}$  which indicates that the amount of negative lone pair is transferred from azine ring to water during the formation of complex. The type **WI** complexes involving single  $N \cdots H-O_w$  interaction have larger value of  $\Delta V_{\min}$  in relative to respective type **WII** complexes involving with  $N \cdots H-O_w$  and  $C-H \cdots O_w$  interactions. The type **WIII** and **WIV** complexes have negative value of  $\Delta V_{\min}$  which indicates the gain in negative lone pair potential by azine at the expense of water molecule during the formation of complex. The type **WIV** complexes with direct  $C-H \cdots O_w$  bonds have larger value of  $\Delta V_{\min}$  in comparison to type **WIII** complexes involving bifurcated structure with oxygen of water connected to two C-H hydrogens.

**Table S4:** SAPT components (in kcal/mol) of the stabilization energy for complexes of azines with water evaluated at L2 level.

| <b>Complexes</b>    | $E_{els}$ | $E_{ind}$ | $E_{disp}$ | $E_{exc}$ | $\delta E_{intr}^{HF}$ | $E_{int}$ |
|---------------------|-----------|-----------|------------|-----------|------------------------|-----------|
| <b>PY-WI</b>        | -13.90    | -5.72     | -4.98      | 19.86     | -1.56                  | -6.30     |
| <b>TZ123-WI</b>     | -14.10    | -5.80     | -5.01      | 20.98     | -1.64                  | -5.57     |
| <b>TTZ1234-WI</b>   | -14.42    | -5.98     | -5.08      | 22.74     | -1.75                  | -4.49     |
| <b>TTZ1235-WI</b>   | -14.38    | -5.92     | -5.04      | 22.68     | -1.79                  | -4.45     |
| <b>PZ-WI</b>        | -14.62    | -6.01     | -5.12      | 23.55     | -1.72                  | -3.92     |
| <b>HZ-WI</b>        | -14.92    | -6.08     | -5.18      | 25.02     | -1.82                  | -2.98     |
| <b>PY-WII</b>       | -12.68    | -5.29     | -4.32      | 17.08     | -1.39                  | -6.60     |
| <b>DZ12-WII</b>     | -13.62    | -5.48     | -4.72      | 18.78     | -1.45                  | -6.49     |
| <b>DZ13-WII</b>     | -13.78    | -5.62     | -4.85      | 19.88     | -1.52                  | -5.89     |
| <b>DZ14-WII</b>     | -13.92    | -5.72     | -4.92      | 20.48     | -1.58                  | -5.66     |
| <b>TZ123-WII</b>    | -14.72    | -6.05     | -5.24      | 21.58     | -1.78                  | -6.21     |
| <b>TZ124-WII</b>    | -14.56    | -5.95     | -5.12      | 21.35     | -1.75                  | -6.03     |
| <b>TZ135-WII</b>    | -14.02    | -5.58     | -4.88      | 20.75     | -1.48                  | -5.21     |
| <b>TTZ1234-WII</b>  | -15.01    | -6.10     | -5.35      | 22.85     | -1.80                  | -5.41     |
| <b>TTZ1245-WII</b>  | -14.94    | -5.90     | -5.15      | 22.54     | -1.71                  | -5.16     |
| <b>TTZ1235-WII</b>  | -14.99    | -6.04     | -5.28      | 22.73     | -1.67                  | -5.25     |
| <b>PZ-WII</b>       | -15.14    | -6.13     | -5.42      | 23.54     | -1.86                  | -5.01     |
| <b>PY-WIII</b>      | -8.40     | -1.92     | -2.10      | 10.65     | -0.26                  | -2.03     |
| <b>DZ12-WIII</b>    | -8.98     | -2.05     | -2.24      | 11.05     | -0.40                  | -2.62     |
| <b>DZ13-WIII</b>    | -8.68     | -2.08     | -2.20      | 11.10     | -0.32                  | -2.18     |
| <b>DZ14-WIII</b>    | -8.42     | -2.02     | -2.18      | 10.98     | -0.28                  | -1.92     |
| <b>TZ123-WIII</b>   | -9.50     | -2.22     | -2.42      | 11.25     | -0.68                  | -3.57     |
| <b>TZ124-WIII</b>   | -9.02     | -2.15     | -2.36      | 11.18     | -0.58                  | -2.93     |
| <b>TTZ1234-WIII</b> | -9.68     | -2.26     | -2.45      | 11.45     | -0.75                  | -3.69     |
| <b>PY-WIV</b>       | -8.10     | -1.88     | -2.25      | 10.38     | -0.12                  | -1.97     |
| <b>DZ12-WIV</b>     | -8.68     | -2.10     | -2.30      | 10.44     | -0.28                  | -2.92     |
| <b>DZ13-WIV</b>     | -8.50     | -2.05     | -2.27      | 10.20     | -0.20                  | -2.82     |
| <b>DZ14-WIV</b>     | -8.25     | -1.98     | -2.28      | 10.50     | -0.25                  | -2.26     |
| <b>TZ123-WIV</b>    | -8.98     | -2.30     | -2.51      | 11.00     | -0.68                  | -3.47     |
| <b>TZ124-WIV</b>    | -8.60     | -2.04     | -2.45      | 10.58     | -0.30                  | -2.81     |

**Table S5:** Geometrical parameters of WI complexes of PY and TZ123 at wB97XD/aug-cc-pVDZ (L1) and MP2/aug-cc-pVDZ (L2). Distances are in Å and angles are in degrees.

| Parameters     | PY-WI  |        | Parameters     | TZ123-WI |        |
|----------------|--------|--------|----------------|----------|--------|
|                | L1     | L2     |                | L1       | L2     |
| C2-N1          | 1.341  | 1.352  | N2-N1          | 1.323    | 1.341  |
| C3-C2          | 1.397  | 1.405  | N3-N2          | 1.324    | 1.343  |
| C4-C3          | 1.396  | 1.405  | C4-N3          | 1.342    | 1.352  |
| C5-C4          | 1.396  | 1.405  | C5-C4          | 1.389    | 1.398  |
| C6-N1          | 1.341  | 1.352  | C6-N1          | 1.342    | 1.353  |
| H7-C2          | 1.092  | 1.095  | H7-C4          | 1.091    | 1.093  |
| H8-C3          | 1.090  | 1.093  | H8-C5          | 1.090    | 1.092  |
| H9-C4          | 1.091  | 1.094  | H9-C6          | 1.091    | 1.093  |
| H10-C5         | 1.090  | 1.093  | H10-N2         | 2.028    | 2.017  |
| H11-C6         | 1.092  | 1.095  | O11-H10        | 0.974    | 0.975  |
| O12-C13        | 0.981  | 0.980  | H12-O11        | 0.964    | 0.965  |
| H13-N1         | 1.919  | 1.915  | N3-N2-N1       | 122.27   | 122.09 |
| H14-O12        | 0.964  | 0.965  | C4-N3-N2       | 119.44   | 119.31 |
| C3-C2-N1       | 123.17 | 123.23 | C5-C4-N3       | 121.86   | 121.92 |
| C4-C3-C2       | 118.53 | 118.77 | C6-N1-N2       | 119.44   | 119.25 |
| C5-C4-C3       | 118.65 | 118.38 | H7-C4-N3       | 115.48   | 115.31 |
| C6-N1-C2       | 31.03  | 117.62 | H8-C5-C4       | 122.43   | 122.28 |
| H7-C2-N1       | 116.12 | 115.92 | H9-C6-N1       | 115.42   | 115.23 |
| H8-C3-C2       | 120.14 | 120.00 | H10-N2-N1      | 120.92   | 125.16 |
| H9-C4-C3       | 120.67 | 120.81 | O11-H10-N2     | 145.81   | 146.83 |
| H10-C5-C4      | 121.33 | 121.23 | H12-O11-H10    | 104.48   | 103.52 |
| H11-C6-N1      | 116.14 | 115.92 | C4-N3-N2-N1    | 0.0      | 0.0    |
| O12-H13-N1     | 176.85 | 176.50 | C5-C4-N3-N2    | -0.0     | 0.0    |
| H13-N1-C2      | 121.21 | 121.29 | C6-N1-N2-N3    | -0.0     | -0.0   |
| H14-O12-H13    | 104.98 | 104.16 | H7-C4-N3-N2    | 180.0    | 180.0  |
| C4-C3-C2-N1    | -0.1   | -0.1   | H8-C5-C4-N3    | 180.0    | 180.0  |
| C5-C4-C3-C2    | -0.0   | -0.0   | H9-C6-N1-N2    | -180.0   | -180.0 |
| C6-N1-C2-C3    | 0.2    | 0.2    | H10-N2-N1-C6   | 179.9    | 179.4  |
| H7-C2-N1-C3    | -180.0 | -180.0 | O11-H10-N2-N1  | -174.1   | -168.5 |
| H8-C3-C2-N1    | -180.0 | -180.0 | H12-O11-H10-N2 | -6.6     | -12.1  |
| H9-C4-C3-C2    | -180.0 | -180.0 |                |          |        |
| H10-C5-C4-C3   | -179.9 | -179.9 |                |          |        |
| H11-C6-N1-C2   | 179.7  | 179.7  |                |          |        |
| O12-H13-N1-C2  | -89.0  | -89.8  |                |          |        |
| H13-N1-C2-C3   | 176.1  | 176.1  |                |          |        |
| H14-O12-H13-N1 | -178.5 | -177.7 |                |          |        |



**Table S6:** Geometrical parameters of WI complexes of TTZ1234 and TTZ1235 at wB97XD/aug-cc-pVDZ (L1) and MP2/aug-cc-pVDZ (L2). Distances are in Å and angles are in degrees.

| Parameters    | TTZ1234-WI |        | Parameters    | TTZ1235-WI |        |
|---------------|------------|--------|---------------|------------|--------|
|               | L1         | L2     |               | L1         | L2     |
| N2-N1         | 1.332      | 1.347  | N2-N1         | 1.321      | 1.338  |
| N3-N2         | 1.318      | 1.341  | N3-N2         | 1.323      | 1.339  |
| N4-N3         | 1.331      | 1.345  | C4-N3         | 1.342      | 1.351  |
| C5-N4         | 1.330      | 1.345  | N5-C4         | 1.332      | 1.344  |
| C6-N1         | 1.330      | 1.346  | C6-N5         | 1.332      | 1.343  |
| H7-C5         | 1.091      | 1.093  | H7-C4         | 1.091      | 1.092  |
| H8-C6         | 1.091      | 1.093  | H8-C6         | 1.091      | 1.092  |
| H9-N3         | 2.097      | 2.085  | H9-N2         | 2.084      | 2.061  |
| O10-H9        | 0.971      | 0.972  | O10-H9        | 0.972      | 0.973  |
| H11-O10       | 0.964      | 0.965  | H11-O10       | 0.964      | 0.965  |
| N3-N2-N1      | 121.53     | 121.51 | N3-N2-N1      | 121.12     | 120.62 |
| N4-N3-N2      | 122.36     | 122.48 | C4-N3-N2      | 117.69     | 117.85 |
| C5-N4-N3      | 117.85     | 117.30 | N5-C4-N3      | 125.28     | 125.45 |
| C6-N1-N2      | 118.13     | 117.66 | C6-N5-C4      | 112.93     | 112.77 |
| H7-C5-N4      | 116.85     | 116.34 | H7-C4-N3      | 116.20     | 116.20 |
| H8-C6-N1      | 116.86     | 116.35 | H8-C6-N5      | 118.55     | 118.35 |
| H9-N3-N2      | 116.41     | 112.60 | H9-N2-N1      | 112.49     | 122.18 |
| O10-H9-N3     | 140.41     | 139.86 | O10-H9-N2     | 117.19     | 178.51 |
| H11-O10-H9    | 104.55     | 103.66 | H11-O10-H9    | 104.60     | 103.75 |
| N4-N3-N2-N1   | 0.1        | 0.0    | C4-N3-N2-N1   | -0.0       | 0.0    |
| C5-N4-N3-N2   | -0.0       | 0.0    | N5-C4-N3-N2   | 0.0        | -0.0   |
| C6-N1-N2-N3   | -0.1       | -0.1   | C6-N5-C4-N3   | -0.0       | 0.0    |
| H7-C5-N4-N3   | -180.0     | 180.0  | H7-C4-N3-N2   | -180.0     | 180.0  |
| H8-C6-N1-N2   | -180.0     | -180.0 | H8-C6-N5-C4   | -180.0     | 180.0  |
| H9-N3-N2-C1   | 179.7      | 179.7  | H9-N2-N1-N3   | -179.1     | -180.0 |
| O10-H9-N3-N2  | -16.3      | -19.5  | O10-H9-N2-N1  | 162.6      | 179.1  |
| H11-O10-H9-N3 | 16.6       | 20.3   | H11-O10-H9-N2 | 16.6       | 0.6    |

**Table S7:** Geometrical parameters of WI complexes of PZ and HZ at wB97XD/aug-cc-pVDZ (L1) and MP2/aug-cc-pVDZ (L2). Distances are in Å and angles are in degrees.

| Parameters   | PZ-WI  |        | Parameters  | HZ-WI  |        |
|--------------|--------|--------|-------------|--------|--------|
|              | L1     | L2     |             | L1     | L2     |
| N2-N1        | 1.318  | 1.337  | N2-N1       | 1.334  | 1.357  |
| N3-N2        | 1.325  | 1.342  | N3-N2       | 1.312  | 1.330  |
| N4-N3        | 1.327  | 1.343  | N4-N3       | 1.323  | 1.333  |
| N5-N4        | 1.321  | 1.340  | N5-N4       | 1.321  | 1.352  |
| C6-N5        | 1.335  | 1.347  | N6-N5       | 1.324  | 1.334  |
| H7-C6        | 1.090  | 1.092  | H7-N4       | 2.232  | 2.090  |
| H8-N2        | 2.137  | 2.103  | O8-H7       | 0.967  | 0.974  |
| O9-H8        | 0.970  | 0.971  | H9-O8       | 0.964  | 0.971  |
| H10-O9       | 0.964  | 0.965  | N3-N2-N1    | 116.07 | 113.70 |
| N3-N2-N1     | 120.91 | 120.55 | N4-N3-N2    | 121.04 | 122.14 |
| N4-N3-N2     | 121.16 | 121.58 | N5-N4-N3    | 116.33 | 114.23 |
| N5-N4-N3     | 120.33 | 119.89 | N6-N5-N4    | 115.84 | 113.28 |
| N3-N2-N1     | 120.91 | 120.55 | H7-N4-N3    | 120.53 | 123.97 |
| N4-N3-N2     | 121.16 | 121.58 | O8-H7-N4    | 130.70 | 132.70 |
| N5-N4-N3     | 120.33 | 119.89 | H9-O8-H7    | 105.12 | 105.36 |
| C6-N5-N4     | 116.66 | 116.62 | N4-N3-N2-N1 | -16.4  | -20.5  |
| H7-C6-N5     | 117.71 | 117.42 | N5-N4-N3-N2 | -17.2  | -20.4  |
| H8-N2-N3     | 119.60 | 123.43 | N6-N5-N4-N3 | 33.1   | 39.8   |
| O9-H8-N2     | 174.39 | 171.13 | H7-N4-N3-N2 | 158.1  | 158.0  |
| H10-O9-H8    | 104.84 | 104.03 | O8-H7-N4-N3 | -82.0  | -108.2 |
| N4-N3-N2-N1  | 0.0    | -0.0   | H9-O8-H7-N4 | 177.1  | -141.5 |
| N5-N4-N3-N2  | -0.0   | 0.0    |             |        |        |
| C6-N5-N4-N3  | 0.0    | 0.0    |             |        |        |
| H7-C6-N5-N4  | 180.0  | 180.0  |             |        |        |
| H8-N2-N3-N1  | 180.0  | 180.0  |             |        |        |
| O9-H8-N2-N3  | 180.0  | 180.0  |             |        |        |
| H10-O9-H8-N2 | -180.0 | -180.0 |             |        |        |

**Table S8:** Geometrical parameters of WII complexes of PY and DZ12 at wB97XD/aug-cc-pVDZ (L1) and MP2/aug-cc-pVDZ (L2). Distances are in Å and angles are in degrees.

| Parameters     | PY-WII |        | Parameters     | DZ12-WII |        |
|----------------|--------|--------|----------------|----------|--------|
|                | L1     | L2     |                | L1       | L2     |
| C2-N1          | 1.348  | 1.353  | N2-N1          | 1.332    | 1.348  |
| C3-C2          | 1.396  | 1.405  | C3-N2          | 1.336    | 1.352  |
| C4-C3          | 1.396  | 1.405  | C4-C3          | 1.400    | 1.406  |
| C5-C4          | 1.396  | 1.405  | C5-C4          | 1.386    | 1.397  |
| C6-N1          | 1.347  | 1.352  | C6-N1          | 1.337    | 1.352  |
| H7-C2          | 1.088  | 1.094  | H7-C3          | 1.091    | 1.094  |
| H8-C3          | 1.087  | 1.093  | H8-C4          | 1.090    | 1.093  |
| H9-C4          | 1.088  | 1.094  | H9-C5          | 1.090    | 1.093  |
| H10-C5         | 1.087  | 1.093  | H10-C6         | 1.091    | 1.093  |
| H11-C6         | 1.088  | 1.094  | H11-N2         | 1.939    | 1.952  |
| H12-N1         | 1.972  | 1.938  | O12-H11        | 0.979    | 0.978  |
| O13-H12        | 0.983  | 0.979  | H13-O12        | 0.963    | 0.964  |
| H14-O13        | 0.971  | 0.964  | C3-N2-N1       | 120.34   | 120.13 |
| C3-C2-N1       | 123.17 | 123.20 | C4-C3-N2       | 123.04   | 123.34 |
| C4-C3-C2       | 118.76 | 118.83 | C5-C4-C3       | 116.92   | 116.91 |
| C5-C4-C3       | 118.59 | 118.34 | C6-N1-N2       | 119.10   | 118.58 |
| C6-N1-C2       | 117.52 | 117.56 | H7-C3-N2       | 114.96   | 114.34 |
| H7-C2-N1       | 115.63 | 115.65 | H8-C4-C3       | 120.80   | 120.88 |
| H8-C3-C2       | 120.02 | 119.95 | H9-C5-C4       | 122.18   | 122.16 |
| H9-C4-C3       | 120.71 | 120.84 | H10-C6-N1      | 114.98   | 114.44 |
| H10-C5-C4      | 121.26 | 121.23 | H11-N2-N1      | 129.14   | 137.95 |
| H11-C6-N1      | 115.89 | 116.10 | O12-H11-N2     | 160.81   | 150.36 |
| H12-N1-C2      | 107.27 | 101.04 | H13-O12-H11    | 105.27   | 104.71 |
| O13-H12-N1     | 164.22 | 155.89 | C4-C3-N2-N1    | -0.0     | -0.0   |
| H14-O13-H12    | 105.80 | 104.71 | C5-C4-C3-N2    | 0.0      | 0.0    |
| C4-C3-C2-N1    | -0.2   | -0.0   | C6-N1-N2-C3    | -0.0     | 0.0    |
| C5-C4-C3-C2    | 0.1    | 0.0    | H7-C3-N2-N1    | 180.0    | 180.0  |
| C6-N1-C2-C3    | 0.3    | 0.0    | H8-C4-C3-N2    | -180.0   | -180.0 |
| H7-C2-N1-C3    | 179.8  | 180.0  | H9-C5-C4-C3    | 180.0    | 180.0  |
| H8-C3-C2-N1    | 179.8  | 180.0  | H10-C6-N1-N2   | -180.0   | -180.0 |
| H9-C4-C3-C2    | 180.1  | -180.0 | H11-N2-N1-C6   | 179.4    | 179.8  |
| H10-C5-C4-C3   | 180.0  | -180.0 | O12-H11-N2-N1  | -177.8   | -179.6 |
| H11-C6-N1-C2   | 179.9  | 180.0  | H13-O12-H11-N2 | 177.9    | 178.7  |
| H12-N1-C2-C3   | -179.6 | -179.9 |                |          |        |
| O13-H12-N1-C2  | 0.0    | 0.0    |                |          |        |
| H14-O13-H12-N1 | 179.7  | -180.0 |                |          |        |

**Table S9:** Geometrical parameters of WII complexes of DZ13 and DZ14 at wB97XD/aug-cc-pVDZ (L1) and MP2/aug-cc-pVDZ (L2). Distances are in Å and angles are in degrees.

| Parameters     | DZ13-WII |        | Parameters     | DZ14-WII |        |
|----------------|----------|--------|----------------|----------|--------|
|                | L1       | L2     |                | L1       | L2     |
| C2-N1          | 1.349    | 1.349  | C2-N1          | 1.339    | 1.352  |
| N3-C2          | 1.337    | 1.348  | C3-C2          | 1.400    | 1.406  |
| C4-N3          | 1.340    | 1.351  | N4-C3          | 1.338    | 1.351  |
| C5-C4          | 1.400    | 1.403  | C5-N4          | 1.338    | 1.351  |
| C6-N1          | 1.341    | 1.352  | C6-N1          | 1.338    | 1.351  |
| H7-C2          | 1.091    | 1.093  | H7-C2          | 1.091    | 1.094  |
| H8-C4          | 1.093    | 1.095  | H8-C3          | 1.091    | 1.094  |
| H9-C5          | 1.089    | 1.092  | H9-C5          | 1.092    | 1.094  |
| H10-C6         | 1.092    | 1.094  | H10-C6         | 1.092    | 1.094  |
| H11-N1         | 1.966    | 1.975  | H11-N1         | 1.972    | 1.977  |
| O12-H11        | 0.977    | 0.976  | O12-H11        | 0.977    | 0.976  |
| H13-O12        | 0.963    | 0.965  | H13-O12        | 0.963    | 0.965  |
| N3-C2-N1       | 126.70   | 126.99 | C3-C2-N1       | 121.55   | 121.84 |
| C4-N3-C2       | 116.05   | 115.76 | N4-C3-C2       | 122.07   | 122.50 |
| C5-C4-N3       | 122.29   | 122.22 | C5-N4-C3       | 116.16   | 115.35 |
| C6-N1-C2       | 116.52   | 116.36 | C6-N1-C2       | 116.56   | 115.90 |
| H7-C2-N1       | 116.61   | 116.50 | H7-C2-N1       | 117.01   | 116.59 |
| H8-C4-N3       | 116.53   | 116.40 | H8-C3-C2       | 120.67   | 120.65 |
| H9-C5-C4       | 121.72   | 121.50 | H9-C5-N4       | 117.30   | 116.88 |
| H10-C6-N1      | 116.38   | 116.19 | H10-C6-N1      | 117.38   | 117.05 |
| H11-N1-C2      | 139.36   | 144.31 | H11-N1-C2      | 104.14   | 99.39  |
| O12-H11-N1     | 155.76   | 150.19 | O12-H11-N1     | 156.04   | 150.02 |
| H13-O12-H11    | 105.64   | 104.83 | H13-O12-H11    | 105.65   | 104.76 |
| C4-N3-C2-N1    | -0.0     | -0.0   | N4-C3-C2-N1    | 0.0      | -0.2   |
| C5-C4-N3-C2    | 0.0      | 0.0    | C5-N4-N3-C2    | -0.0     | 0.1    |
| C6-N1-C2-N3    | 0.0      | -0.0   | C6-N1-C2-C3    | -0.0     | 0.2    |
| H7-C2-N1-C6    | -180.0   | 180.0  | H7-C2-N1-C3    | -180.0   | -179.8 |
| H8-C4-N3-C2    | -180.0   | -180.0 | H8-C3-C2-N1    | -180.0   | 179.9  |
| H9-C5-C4-N3    | 180.0    | 180.0  | H9-C5-N4-C3    | 180.1    | -179.9 |
| H10-C6-N1-C2   | -180.0   | -180.0 | H10-C6-N1-C2   | -180.0   | -180.0 |
| H11-N1-C2-N3   | -179.8   | -179.9 | H11-N1-C2-C3   | 179.8    | 177.8  |
| O12-H11-N1-C2  | -179.8   | 179.7  | O12-H11-N1-C2  | -1.0     | -4.5   |
| H13-O12-H11-N1 | -180.0   | -179.1 | H13-O12-H11-N1 | -179.7   | -173.4 |

**Table S10:** Geometrical parameters of WII complexes of TZ123 and TZ124 at wB97XD/aug-cc-pVDZ (L1) and MP2/aug-cc-pVDZ (L2). Distances are in Å and angles are in degrees.

| Parameters     | TZ123-WII |        | Parameters     | TZ124-WII |        |
|----------------|-----------|--------|----------------|-----------|--------|
|                | L1        | L2     |                | L1        | L2     |
| N2-N1          | 1.323     | 1.341  | N2-N1          | 1.332     | 1.347  |
| N3-N2          | 1.324     | 1.343  | C3-N2          | 1.337     | 1.350  |
| C4-N3          | 1.342     | 1.352  | N4-C3          | 1.341     | 1.352  |
| C5-C4          | 1.389     | 1.398  | C5-N4          | 1.329     | 1.343  |
| C6-N1          | 1.342     | 1.353  | C6-N1          | 1.333     | 1.349  |
| H7-C4          | 1.091     | 1.093  | H7-C3          | 1.090     | 1.093  |
| H8-C5          | 1.090     | 1.092  | H8-C5          | 1.093     | 1.094  |
| H9-C6          | 1.091     | 1.093  | H9-C6          | 1.090     | 1.093  |
| H10-N2         | 2.028     | 2.017  | H10-N2         | 1.993     | 2.003  |
| O11-H10        | 0.974     | 0.975  | O11-H10        | 0.975     | 0.975  |
| H12-O11        | 0.964     | 0.965  | H12-O11        | 0.963     | 0.965  |
| N3-N2-N1       | 122.27    | 122.09 | C3-N2-N1       | 118.93    | 119.00 |
| C4-N3-N2       | 119.44    | 119.31 | N4-C3-N2       | 126.31    | 126.73 |
| C5-C4-N3       | 121.86    | 121.92 | C5-N4-C3       | 114.60    | 114.15 |
| C6-N1-N2       | 119.44    | 119.25 | C6-N1-N2       | 117.95    | 117.13 |
| H7-C4-N3       | 115.48    | 115.31 | H7-C3-N2       | 115.58    | 115.22 |
| H8-C5-C4       | 122.43    | 122.28 | H8-C5-N4       | 117.83    | 117.55 |
| H9-C6-N1       | 115.42    | 115.23 | H9-C6-N1       | 116.28    | 115.60 |
| H10-N2-N1      | 120.92    | 125.16 | H10-N2-N1      | 133.08    | 139.45 |
| O11-H10-N2     | 145.81    | 146.83 | O11-H10-N2     | 154.75    | 147.70 |
| H12-O11-H10    | 104.48    | 103.52 | H12-O11-H10    | 105.52    | 104.80 |
| C4-N3-N2-N1    | 0.0       | 0.0    | N4-C3-N2-N1    | 0.0       | -0.4   |
| C5-C4-N3-N2    | -0.0      | 0.0    | C5-N4-C3-N2    | 0.0       | 0.2    |
| C6-N1-N2-N3    | -0.0      | -0.0   | C6-N1-N2-C3    | -0.0      | 0.2    |
| H7-C4-N3-N2    | 180.0     | 180.0  | H7-C3-N2-N1    | 180.0     | 179.5  |
| H8-C5-C4-N3    | 180.0     | 180.0  | H8-C5-N4-C3    | -180.0    | -179.9 |
| H9-C6-N1-N2    | -180.0    | -180.0 | H9-C6-N1-N2    | 180.0     | -179.9 |
| H10-N2-N1-C6   | 179.9     | 179.4  | H10-N2-N1-C6   | -179.7    | 173.8  |
| O11-H10-N2-N1  | -174.1    | -168.5 | O11-H10-N2-N1  | 179.8     | -168.9 |
| H12-O11-H10-N2 | -6.6      | -12.1  | H12-O11-H10-N2 | 179.5     | 179.4  |

**Table S11:** Geometrical parameters of WII complexes of TZ135 and TZ1234 at wB97XD/aug-cc-pVDZ (L1) and MP2/aug-cc-pVDZ (L2). Distances are in Å and angles are in degrees.

| Parameters     | TZ135-WII |        | Parameters    | TTZ1234-WII |        |
|----------------|-----------|--------|---------------|-------------|--------|
|                | L1        | L2     |               | L1          | L2     |
| C2-N1          | 1.340     | 1.349  | N2-N1         | 1.332       | 1.347  |
| N3-C2          | 1.336     | 1.346  | N3-N2         | 1.318       | 1.341  |
| C4-N3          | 1.338     | 1.347  | N4-N3         | 1.331       | 1.345  |
| C5-C4          | 1.338     | 1.347  | C5-N4         | 1.330       | 1.345  |
| C6-N5          | 1.336     | 1.346  | C6-N1         | 1.330       | 1.346  |
| H7-C2          | 1.091     | 1.093  | H7-C5         | 1.091       | 1.093  |
| H8-C4          | 1.092     | 1.093  | H8-C6         | 1.091       | 1.093  |
| H9-C6          | 1.092     | 1.093  | H9-N3         | 2.097       | 2.085  |
| H10-N1         | 2.012     | 2.037  | O10-H9        | 0.971       | 0.972  |
| O11-H10        | 0.974     | 0.974  | H11-O10       | 0.964       | 0.965  |
| H12-O11        | 0.963     | 0.965  | N3-N2-N1      | 121.53      | 121.51 |
| N3-C2-N1       | 125.23    | 125.35 | N4-N3-N2      | 122.36      | 122.48 |
| C4-N3-C2       | 114.45    | 114.27 | C5-N4-N3      | 117.85      | 117.30 |
| C5-C4-N3       | 125.80    | 126.00 | C6-N1-N2      | 118.13      | 117.66 |
| C6-N5-C4       | 114.32    | 114.12 | H7-C5-N4      | 116.85      | 116.34 |
| H7-C2-N1       | 116.93    | 116.80 | H8-C6-N1      | 116.86      | 116.35 |
| H8-C4-N3       | 117.12    | 117.02 | H9-N3-N2      | 116.41      | 112.60 |
| H9-C6-N5       | 117.28    | 117.18 | O10-H9-N3     | 140.41      | 139.86 |
| H10-N1-C2      | 103.75    | 99.10  | H11-O10-H9    | 104.55      | 103.66 |
| O11-H10-N1     | 152.18    | 145.53 | N4-N3-N2-N1   | 0.1         | 0.0    |
| H12-O11-H10    | 105.76    | 104.97 | C5-N4-N3-N2   | -0.0        | 0.0    |
| C4-N3-C2-N1    | 0.0       | 0.0    | C6-N1-N2-N3   | -0.1        | -0.1   |
| C5-C4-N3-C2    | -0.0      | -0.0   | H7-C5-N4-N3   | -180.0      | 180.0  |
| C6-N5-C4-N3    | 0.0       | -0.0   | H8-C6-N1-N2   | -180.0      | -180.0 |
| H7-C2-N1-C6    | 180.0     | -180.0 | H9-N3-N2-C1   | 179.7       | 179.7  |
| H8-C4-N3-C2    | 180.0     | -180.0 | O10-H9-N3-N2  | -16.3       | -19.5  |
| H9-C6-N5-C4    | -180.0    | -180.0 | H11-O10-H9-N3 | 16.6        | 20.3   |
| H10-N1-C2-N3   | -180.0    | 179.6  |               |             |        |
| O11-H10-N1-C2  | 0.6       | -0.5   |               |             |        |
| H12-O11-H10-N1 | 177.2     | 179.4  |               |             |        |

**Table S12:** Geometrical parameters of WII complexes of TTZ1235 and TZ1245 at wB97XD/aug-cc-pVDZ (L1) and MP2/aug-cc-pVDZ (L2). Distances are in Å and angles are in degrees.

| Parameters    | TTZ1235-WII |        | Parameters    | TTZ1245-WII |        |
|---------------|-------------|--------|---------------|-------------|--------|
|               | L1          | L2     |               | L1          | L2     |
| N2-N1         | 1.326       | 1.340  | N2-N1         | 1.343       | 1.343  |
| N3-N2         | 1.322       | 1.339  | C3-N2         | 1.352       | 1.352  |
| C4-N3         | 1.343       | 1.351  | N4-C3         | 1.352       | 1.352  |
| N5-C4         | 1.332       | 1.343  | N5-N4         | 1.341       | 1.341  |
| C6-N5         | 1.091       | 1.344  | C6-N1         | 1.352       | 1.352  |
| H7-C4         | 1.091       | 1.093  | H7-C3         | 1.092       | 1.092  |
| H8-C6         | 1.091       | 1.093  | H8-C6         | 1.092       | 1.092  |
| H9-N1         | 2.076       | 2.094  | O9-H8         | 2.083       | 2.092  |
| O10-H9        | 0.972       | 0.972  | H10-N1        | 0.963       | 0.972  |
| H11-O10       | 0.964       | 0.965  | H11-O9        | 0.965       | 0.965  |
| N3-N2-N1      | 120.25      | 119.61 | C3-N2-N1      | 116.60      | 116.60 |
| C4-N3-N2      | 117.95      | 118.18 | N4-C3-N2      | 126.46      | 126.46 |
| N5-C4-N3      | 125.51      | 125.68 | N5-N4-C3      | 117.19      | 117.19 |
| C6-N5-C4      | 112.90      | 112.74 | C6-N1-N2      | 116.57      | 116.57 |
| H7-C4-N3      | 116.06      | 116.07 | H7-C3-N2      | 117.35      | 117.35 |
| H8-C6-N5      | 119.25      | 119.18 | H8-C6-N1      | 116.45      | 116.45 |
| H9-N1-N2      | 139.16      | 141.55 | O9-H8-C6      | 140.26      | 143.39 |
| O10-H9-N1     | 140.76      | 135.86 | H10-N1-N2     | 141.24      | 136.12 |
| H11-O10-H9    | 105.84      | 105.02 | H11-O9-H10    | 105.83      | 105.05 |
| C4-N3-N2-N1   | -0.0        | -0.0   | N4-C3-N2-N1   | 0.0         | 0.0    |
| N5-C4-N3-N2   | 0.0         | 0.0    | N5-N4-C3-N2   | -0.0        | -0.0   |
| C6-N5-C4-N3   | 0.0         | 0.0    | C6-N1-N2-C3   | 0.0         | 0.0    |
| H7-C4-N3-N2   | -180.0      | -180.0 | H7-C3-N2-N1   | -180.0      | -180.0 |
| H8-C6-N5-C4   | 180.0       | 180.0  | H8-C6-N1-N2   | 180.0       | 180.0  |
| H9-N1-N2-N3   | -180.0      | -180.0 | O9-H8-C6-N1   | -179.4      | 179.2  |
| O10-H9-N1-N2  | 180.0       | 180.0  | H10-N1-N2-C3  | 179.2       | -179.2 |
| H11-O10-H9-N1 | -180.0      | 180.0  | H11-O9-H10-N1 | -178.4      | -179.9 |

**Table S13:** Geometrical parameters of PZ-WII and PY-WIII complexes at wB97XD/aug-cc-pVDZ (L1) and MP2/aug-cc-pVDZ (L2). Distances are in Å and angles are in degrees.

| Parameters   | PZ-WII |        | Parameters     | PY-WIII |        |
|--------------|--------|--------|----------------|---------|--------|
|              | L1     | L2     |                | L1      | L2     |
| N2-N1        | 1.319  | 1.338  | C2-N1          | 1.340   | 1.353  |
| N3-N2        | 1.326  | 1.343  | C3-C2          | 1.399   | 1.407  |
| N4-N3        | 1.328  | 1.344  | C4-C3          | 1.397   | 1.405  |
| N5-N4        | 1.320  | 1.339  | C5-C4          | 1.396   | 1.405  |
| C6-N5        | 1.336  | 1.347  | C6-N1          | 1.341   | 1.354  |
| H7-C6        | 1.090  | 1.092  | H7-C2          | 1.093   | 1.095  |
| H8-N1        | 2.218  | 2.236  | H8-C3          | 1.091   | 1.094  |
| O9-H8        | 0.969  | 0.970  | H9-C4          | 1.090   | 1.093  |
| H10-O9       | 0.964  | 0.965  | H10-C5         | 1.089   | 1.093  |
| N3-N2-N1     | 120.21 | 119.67 | H11-C6         | 1.093   | 1.095  |
| N4-N3-N2     | 121.33 | 121.99 | O12-H10        | 2.808   | 2.629  |
| N5-N4-N3     | 120.52 | 119.99 | H13-O12        | 0.965   | 0.966  |
| C6-N5-N4     | 116.71 | 116.72 | H14-O12        | 0.965   | 0.966  |
| H7-C6-N5     | 118.63 | 118.44 | C3-C2-N1       | 123.64  | 123.78 |
| H8-N1-N2     | 143.76 | 144.74 | C4-C3-C2       | 118.54  | 118.81 |
| O9-H8-N1     | 127.38 | 123.51 | C5-C4-C3       | 118.43  | 118.12 |
| H10-O9-H8    | 105.92 | 105.06 | C6-N1-C2       | 117.21  | 116.70 |
| N4-N3-N2-N1  | -0.4   | -0.1   | H7-C2-N1       | 116.10  | 115.84 |
| N5-N4-N3-N2  | 0.2    | 0.1    | H8-C3-C2       | 120.12  | 119.93 |
| C6-N5-N4-N3  | 0.1    | 0.0    | H9-C4-C3       | 121.52  | 121.82 |
| H7-C6-N5-N4  | 179.6  | 179.9  | H10-C5-C4      | 120.49  | 120.33 |
| H8-N1-N2-N3  | -178.3 | 179.8  | H11-C6-N1      | 116.02  | 115.75 |
| O9-H8-N1-N2  | 178.0  | -179.9 | O12-H10-C5     | 122.14  | 120.85 |
| H10-O9-H8-N1 | 179.5  | -180.0 | H13-O12-H10    | 120.01  | 120.21 |
|              |        |        | H14-O12-H10    | 124.07  | 124.34 |
|              |        |        | C4-C3-C2-N1    | 0.0     | -0.0   |
|              |        |        | C5-C4-C3-C2    | 0.0     | 0.0    |
|              |        |        | C6-N1-C2-C3    | -0.0    | -0.0   |
|              |        |        | H7-C2-N1-C3    | -180.0  | 180.0  |
|              |        |        | H8-C3-C2-N1    | -180.0  | 180.0  |
|              |        |        | H9-C4-C3-C2    | -180.0  | -180.0 |
|              |        |        | H10-C5-C4-C3   | 180.0   | -180.0 |
|              |        |        | H11-C6-N1-C2   | -180.0  | -180.0 |
|              |        |        | O12-H10-C5-C4  | -0.3    | 1.8    |
|              |        |        | H13-O12-H10-C5 | 112.8   | 108.3  |
|              |        |        | H14-O12-H10-C5 | -108.9  | -114.6 |



**Table S14:** Geometrical parameters of DZ12-WIII and DZ13-WIII complexes at wB97XD/aug-cc-pVDZ (L1) and MP2/aug-cc-pVDZ (L2). Distances are in Å and angles are in degrees.

| Parameters    | DZ12-WIII |        | Parameters    | DZ13-WIII |        |
|---------------|-----------|--------|---------------|-----------|--------|
|               | L1        | L2     |               | L1        | L2     |
| N2-N1         | 1.334     | 1.351  | C2-N1         | 1.339     | 1.350  |
| C3-N2         | 1.339     | 1.353  | N3-C2         | 1.339     | 1.350  |
| C4-C3         | 1.400     | 1.407  | C4-N3         | 1.341     | 1.352  |
| C5-C4         | 1.386     | 1.397  | C5-C4         | 1.395     | 1.402  |
| C6-N1         | 1.339     | 1.353  | C6-N1         | 1.341     | 1.352  |
| H7-C3         | 1.092     | 1.094  | H7-C2         | 1.092     | 1.094  |
| H8-C4         | 1.089     | 1.092  | H8-C4         | 1.093     | 1.095  |
| H9-C5         | 1.089     | 1.092  | H9-C5         | 1.089     | 1.091  |
| H10-C6        | 1.092     | 1.094  | H10-C6        | 1.092     | 1.094  |
| O11-H9        | 2.715     | 2.593  | O11-H9        | 2.613     | 2.510  |
| H12-O11       | 0.965     | 0.966  | H12-O11       | 0.965     | 0.966  |
| H13-O11       | 0.965     | 0.966  | H13-O11       | 0.965     | 0.966  |
| C3-N2-N1      | 119.45    | 119.06 | N3-C2-N1      | 127.15    | 127.47 |
| C4-C3-N2      | 123.70    | 124.16 | C4-N3-C2      | 115.88    | 115.62 |
| C5-C4-C3      | 116.85    | 116.79 | C5-C4-N3      | 122.30    | 122.21 |
| C6-N1-N2      | 119.45    | 119.06 | C6-N1-C2      | 115.90    | 115.62 |
| H7-C3-N2      | 114.87    | 114.35 | H7-C2-N1      | 116.44    | 116.28 |
| H8-C4-C3      | 121.70    | 121.92 | H8-C4-N3      | 116.49    | 116.35 |
| H9-C5-C4      | 121.44    | 121.28 | H9-C5-C4      | 122.58    | 122.66 |
| H10-C6-N1     | 114.87    | 114.35 | H10-C6-N1     | 117.12    | 117.10 |
| O11-H9-C5     | 121.43    | 119.54 | O11-H9-C5     | 128.19    | 117.68 |
| H12-O11-H9    | 123.33    | 123.08 | H12-O11-H9    | 127.48    | 128.06 |
| H13-O11-H9    | 122.29    | 121.99 | H13-O11-H9    | 124.33    | 124.39 |
| C4-C3-N2-N1   | -0.0      | -0.0   | C4-N3-C2-N1   | -0.0      | -0.0   |
| C5-C4-C3-N2   | -0.0      | 0.0    | C5-C4-N3-C2   | 0.0       | 0.0    |
| C6-N1-N2-C3   | 0.0       | 0.0    | C6-N1-C2-N3   | -0.0      | 0.0    |
| H7-C3-N2-N1   | 180.0     | 180.0  | H7-C2-N1-C6   | 180.0     | 180.0  |
| H8-C4-C3-N2   | 180.0     | -180.0 | H8-C4-N3-C2   | -180.0    | -180.0 |
| H9-C5-C4-C3   | -180.0    | -180.0 | H9-C5-C4-N3   | -180.0    | 180.0  |
| H10-C6-N1-N2  | -180.0    | 180.0  | H10-C6-N1-C2  | -180.0    | -180.0 |
| O11-H9-C5-C4  | 0.1       | 0.2    | O11-H9-C5-C4  | -179.0    | -177.7 |
| H12-O11-H9-C5 | 109.0     | 110.6  | H12-O11-H9-C5 | -103.3    | -105.7 |
| H13-O11-H9-C5 | -110.1    | -111.4 | H13-O11-H9-C5 | 100.8     | 99.5   |

**Table S15:** Geometrical parameters of DZ14-WIII and TZ123-WIII complexes at wB97XD/aug-cc-pVDZ (L1) and MP2/aug-cc-pVDZ (L2). Distances are in Å and angles are in degrees.

| Parameters    | DZ14-WIII |        | Parameters    | TZ123-WIII |        |
|---------------|-----------|--------|---------------|------------|--------|
|               | L1        | L2     |               | L1         | L2     |
| C2-N1         | 1.339     | 1.347  | N2-N1         | 1.326      | 1.345  |
| C3-C2         | 1.401     | 1.399  | N3-N2         | 1.327      | 1.346  |
| N4-C3         | 1.339     | 1.347  | C4-N3         | 1.342      | 1.353  |
| C5-N4         | 1.339     | 1.347  | C5-C4         | 1.389      | 1.398  |
| C6-N1         | 1.339     | 1.347  | C6-N1         | 1.343      | 1.353  |
| H7-C2         | 1.091     | 1.086  | H7-C4         | 1.090      | 1.092  |
| H8-C3         | 1.091     | 1.086  | H8-C5         | 1.089      | 1.091  |
| H9-C5         | 1.093     | 1.088  | H9-C6         | 1.091      | 1.094  |
| H10-C6        | 1.093     | 1.088  | O10-H8        | 2.560      | 2.491  |
| O11-H8        | 2.734     | 2.597  | H11-O10       | 0.965      | 0.966  |
| H12-O11       | 0.965     | 0.972  | H12-O10       | 0.965      | 0.966  |
| H13-O11       | 0.965     | 0.972  | N3-N2-N1      | 121.58     | 121.32 |
| C3-C2-N1      | 122.01    | 122.30 | C4-N3-N2      | 119.74     | 119.67 |
| N4-C3-C2      | 122.01    | 122.30 | C5-C4-N3      | 122.03     | 122.08 |
| C5-N4-N3      | 115.94    | 115.33 | C6-N1-N2      | 119.75     | 119.63 |
| C6-N1-C2      | 115.94    | 115.33 | H7-C4-N3      | 116.08     | 116.04 |
| H7-C2-N1      | 117.84    | 117.54 | H8-C5-C4      | 121.62     | 121.40 |
| H8-C3-C2      | 120.16    | 121.10 | H9-C6-N1      | 115.35     | 115.17 |
| H9-C5-N4      | 117.23    | 116.66 | O10-H8-C5     | 125.95     | 122.02 |
| H10-C6-N1     | 117.23    | 116.66 | H11-O10-H8    | 126.17     | 126.59 |
| O11-H8-C3     | 122.77    | 121.10 | H12-O10-H8    | 125.79     | 124.77 |
| H12-O11-H8    | 122.75    | 121.73 | C4-N3-N2-N1   | -0.0       | -0.0   |
| H13-O11-H8    | 123.07    | 122.27 | C5-C4-N3-N2   | 0.0        | 0.0    |
| N4-C3-C2-N1   | 0.0       | 0.0    | C6-N1-N2-N3   | 0.0        | 0.0    |
| C5-N4-N3-C2   | 0.0       | -0.0   | H7-C4-N3-N2   | -180.0     | -180.0 |
| C6-N1-C2-C3   | -0.0      | -0.0   | H8-C5-C4-N3   | -180.0     | -180.0 |
| H7-C2-N1-C6   | 180.0     | -180.0 | H9-C6-N1-N2   | -180.0     | 180.0  |
| H8-C3-C2-N1   | -180.0    | -180.0 | O10-H8-C5-C6  | -179.9     | -179.5 |
| H9-C5-N4-C3   | 180.0     | -180.0 | H11-O10-H8-C5 | -102.0     | -104.9 |
| H10-C6-N1-C2  | -180.0    | 180.0  | H12-O10-H8-C5 | 101.7      | 103.9  |
| O11-H8-C3-C2  | 0.1       | 0.6    |               |            |        |
| H12-O11-H8-C3 | 109.3     | 109.6  |               |            |        |
| H13-O11-H8-C3 | -109.4    | -111.4 |               |            |        |

**Table S16:** Geometrical parameters of TZ124-WIII and TTZ1234-WIII complexes at wB97XD/aug-cc-pVDZ (L1) and MP2/aug-cc-pVDZ (L2). Distances are in Å and angles are in degrees.

| Parameters    | TZ124-WIII |        | Parameters   | TTZ1234-WIII |        |
|---------------|------------|--------|--------------|--------------|--------|
|               | L1         | L2     |              | L1           | L2     |
| N2-N1         | 1.335      | 1.350  | N2-N1        | 1.337        | 1.349  |
| C3-N2         | 1.337      | 1.349  | N3-N2        | 1.317        | 1.342  |
| N4-C3         | 1.342      | 1.353  | N4-N3        | 1.337        | 1.349  |
| C5-N4         | 1.330      | 1.345  | C5-N4        | 1.329        | 1.346  |
| C6-N1         | 1.334      | 1.350  | C6-N1        | 1.329        | 1.346  |
| H7-C3         | 1.091      | 1.093  | H7-C5        | 1.090        | 1.092  |
| H8-C5         | 1.091      | 1.093  | H8-C6        | 1.090        | 1.092  |
| H9-C6         | 1.090      | 1.092  | O9-H8        | 2.638        | 2.536  |
| O10-H9        | 2.709      | 2.561  | H10-O9       | 0.965        | 0.967  |
| H11-O10       | 0.965      | 0.966  | H11-H10      | 0.965        | 0.967  |
| H12-O10       | 0.965      | 0.966  | N3-N2-N1     | 121.81       | 121.85 |
| C3-N2-N1      | 118.17     | 118.12 | N4-N3-N2     | 121.86       | 121.85 |
| N4-C3-N2      | 127.01     | 127.52 | C5-N4-N3     | 118.10       | 117.67 |
| C5-N4-C3      | 114.43     | 113.97 | C6-N1-N2     | 118.11       | 117.67 |
| C6-N1-N2      | 118.25     | 117.53 | H7-C5-N4     | 117.74       | 117.28 |
| H7-C3-N2      | 115.52     | 115.20 | H8-C6-N1     | 117.76       | 117.29 |
| H8-C5-N4      | 118.62     | 118.36 | O9-H8-C6     | 119.00       | 117.43 |
| H9-C6-N1      | 116.98     | 116.41 | H10-O9-H8    | 121.89       | 121.95 |
| O10-H9-C6     | 119.50     | 119.44 | H11-H10-O9   | 122.14       | 122.23 |
| H11-O10-H9    | 121.24     | 121.14 | N4-N3-N2-N1  | 0.0          | 0.0    |
| H12-O10-H9    | 121.47     | 122.32 | C5-N4-N3-N2  | -0.0         | -0.0   |
| N4-C3-N2-N1   | 0.0        | -0.0   | C6-N1-N2-N3  | -0.0         | -0.0   |
| C5-N4-C3-N2   | -0.0       | 0.0    | H7-C5-N4-N3  | 180.0        | -180.0 |
| C6-N1-N2-C3   | 0.0        | 0.0    | H8-C6-N1-N2  | 180.0        | -180.0 |
| H7-C3-N2-N1   | -180.0     | 180.0  | O9-H8-C6-N1  | 180.0        | -179.8 |
| H8-C5-N4-C3   | 180.0      | 180.0  | H10-O9-H8-C6 | -111.1       | -112.2 |
| H9-C6-N1-N2   | 180.0      | 180.0  | H11-O9-H8-C6 | 110.8        | 111.3  |
| O10-H9-C6-N1  | 179.9      | -179.8 |              |              |        |
| H11-O10-H9-C6 | -112.0     | -112.8 |              |              |        |
| H12-O10-H9-C6 | 111.9      | 111.8  |              |              |        |

**Table S17:** Geometrical parameters of PY-WIV and DZ12-WIV complexes at wB97XD/aug-cc-pVDZ (L1) and MP2/aug-cc-pVDZ (L2). Distances are in Å and angles are in degrees.

| Parameters    | PY-WIV |        | Parameters     | DZ12-WIV |        |
|---------------|--------|--------|----------------|----------|--------|
|               | L1     | L2     |                | L1       | L2     |
| C2-N1         | 1.341  | 1.348  | N2-N1          | 1.345    | 1.349  |
| C3-C2         | 1.398  | 1.397  | C3-N2          | 1.350    | 1.358  |
| C4-C3         | 1.397  | 1.397  | C4-C3          | 1.401    | 1.408  |
| C5-C4         | 1.397  | 1.397  | C5-C4          | 1.386    | 1.397  |
| C6-N1         | 1.341  | 1.348  | C6-N1          | 1.341    | 1.356  |
| H7-C2         | 1.089  | 1.089  | H7-C3          | 1.093    | 1.098  |
| H8-C3         | 1.087  | 1.088  | H8-C4          | 1.089    | 1.094  |
| H9-C4         | 1.087  | 1.087  | H9-C5          | 1.089    | 1.094  |
| H10-C5        | 1.087  | 1.088  | H10-C6         | 1.092    | 1.094  |
| H11-C6        | 1.089  | 1.089  | O11-H9         | 2.221    | 2.227  |
| O12-H9        | 2.325  | 2.256  | H12-O11        | 0.961    | 0.966  |
| H13-O12       | 0.969  | 0.972  | H13-O11        | 0.961    | 0.966  |
| H14-O12       | 0.970  | 0.972  | C3-N2-N1       | 119.45   | 119.06 |
| C3-C2-N1      | 123.69 | 123.73 | C4-C3-N2       | 123.70   | 124.16 |
| C4-C3-C2      | 118.74 | 118.99 | C5-C4-C3       | 115.85   | 114.79 |
| C5-C4-C3      | 118.07 | 117.92 | C6-N1-N2       | 119.45   | 119.06 |
| C6-N1-C2      | 117.08 | 116.66 | H7-C3-N2       | 114.87   | 114.35 |
| H7-C2-N1      | 115.86 | 115.58 | H8-C4-C3       | 121.70   | 122.92 |
| H8-C3-C2      | 120.18 | 120.06 | H9-C5-C4       | 121.44   | 121.28 |
| H9-C4-C3      | 120.98 | 120.99 | H10-C6-N1      | 115.87   | 114.53 |
| H10-C5-C4     | 121.08 | 120.95 | O11-H9-C5      | 179.08   | 179.28 |
| H11-C6-N1     | 115.86 | 115.59 | H12-O11-H9     | 125.33   | 125.08 |
| O12-H9-C4     | 176.28 | 178.91 | H13-O11-H9     | 124.29   | 124.99 |
| H13-O12-H9    | 129.98 | 126.50 | C4-C3-N2-N1    | -0.0     | -0.0   |
| H14-O12-H9    | 124.48 | 125.20 | C5-C4-C3-N2    | -0.0     | 0.0    |
| C4-C3-C2-N1   | -0.0   | 0.1    | C6-N1-N2-C3    | 0.0      | 0.0    |
| C5-C4-C3-C2   | 0.1    | -0.1   | H7-C3-N2-N1    | 180.0    | 180.0  |
| C6-N1-C2-C3   | -0.0   | -0.1   | H8-C4-C3-N2    | 180.0    | -180.0 |
| H7-C2-N1-C3   | -180.1 | -180.0 | H9-C5-C4-C3    | -180.0   | -180.0 |
| H8-C3-C2-N1   | -179.9 | -179.9 | H10-C6-N1-N2   | -180.0   | 180.0  |
| H9-C4-C3-C2   | -179.8 | 180.0  | O11-H9-C5-C4   | 120.1    | 121.5  |
| H10-C5-C4-C3  | 180.0  | -180.0 | H12-O11-H9-C5  | -38.1    | -37.6  |
| H11-C6-N1-C2  | -180.0 | 180.0  | H13-O11-H12-H9 | 139.1    | 140.4  |
| O12-H9-C4-C3  | 96.5   | -79.2  |                |          |        |
| H13-O12-H9-C4 | 170.8  | 168.2  |                |          |        |
| H14-O12-H9-C4 | -6.0   | -9.7   |                |          |        |

**Table S18:** Geometrical parameters of DZ13-WIV and DZ14-WIII complexes at wB97XD/aug-cc-pVDZ (L1) and MP2/aug-cc-pVDZ (L2). Distances are in Å and angles are in degrees.

| Parameters    | DZ13-WIV |        | Parameters    | DZ14-WIV |        |
|---------------|----------|--------|---------------|----------|--------|
|               | L1       | L2     |               | L1       | L2     |
| C2-N1         | 1.338    | 1.344  | C2-N1         | 1.339    | 1.346  |
| N3-C2         | 1.338    | 1.344  | C3-C2         | 1.398    | 1.397  |
| C4-N3         | 1.341    | 1.347  | N4-C3         | 1.339    | 1.346  |
| C5-C4         | 1.395    | 1.394  | C5-N4         | 1.341    | 1.349  |
| C6-N1         | 1.341    | 1.347  | C6-N1         | 1.339    | 1.346  |
| H7-C2         | 1.088    | 1.087  | H7-C2         | 1.088    | 1.088  |
| H8-C4         | 1.089    | 1.088  | H8-C3         | 1.088    | 1.088  |
| H9-C5         | 1.086    | 1.086  | H9-C5         | 1.088    | 1.087  |
| H10-C6        | 1.089    | 1.088  | H10-C6        | 1.088    | 1.088  |
| O11-H9        | 2.288    | 2.232  | O11-H9        | 2.308    | 2.248  |
| H12-O11       | 0.970    | 0.972  | H12-O11       | 0.969    | 0.972  |
| H13-O11       | 0.970    | 0.972  | H13-O11       | 0.969    | 0.972  |
| N3-C2-N1      | 127.10   | 127.22 | C3-C2-N1      | 122.00   | 122.29 |
| C4-N3-C2      | 115.83   | 115.60 | N4-C3-C2      | 122.12   | 122.40 |
| C5-C4-N3      | 122.57   | 122.56 | C5-N4-N3      | 116.07   | 115.53 |
| C6-N1-C2      | 115.83   | 115.60 | C6-N1-C2      | 115.84   | 115.24 |
| H7-C2-N1      | 116.45   | 116.39 | H7-C2-N1      | 117.04   | 116.66 |
| H8-C4-N3      | 116.29   | 116.09 | H8-C3-C2      | 120.85   | 120.94 |
| H9-C5-C4      | 122.0    | 121.78 | H9-C5-N4      | 117.35   | 117.25 |
| H10-C6-N1     | 116.30   | 116.10 | H10-C6-N1     | 116.98   | 116.63 |
| O11-H9-C5     | 178.29   | 179.63 | O11-H9-C5     | 178.99   | 178.34 |
| H12-O11-H9    | 126.80   | 127.10 | H12-O11-H9    | 114.15   | 120.52 |
| H13-O11-H9    | 127.67   | 127.63 | H13-O11-H9    | 112.13   | 120.32 |
| C4-N3-C2-N1   | -0.0     | 0.0    | N4-C3-C2-N1   | 0.0      | -0.0   |
| C5-C4-N3-C2   | -0.0     | -0.0   | C5-N4-C3-C2   | 0.0      | 0.0    |
| C6-N1-C2-N3   | 0.0      | -0.0   | C6-N1-C2-C3   | -0.0     | 0.0    |
| H7-C2-N1-C6   | -180.0   | 180.0  | H7-C2-N1-C6   | 180.0    | -180.0 |
| H8-C4-N3-C2   | -180.0   | 180.0  | H8-C3-C2-N1   | -180.0   | -180.0 |
| H9-C5-C4-N3   | -180.0   | -180.0 | H9-C5-N4-C3   | 180.0    | 180.0  |
| H10-C6-N1-C2  | 180.0    | -180.0 | H10-C6-N1-C2  | -180.0   | -180.0 |
| O11-H9-C5-C4  | 119.5    | 121.6  | O11-H9-C5-N4  | -174.0   | -178.4 |
| H12-O11-H9-C5 | -28.7    | -31.6  | H12-O11-H9-C5 | -121.9   | -114.6 |
| H13-O11-H9-C5 | 149.1    | 148.3  | H13-O11-H9-C5 | 118.3    | 111.1  |

**Table S19:** Geometrical parameters of TZ123-WIII and TZ124-WIV complexes at wB97XD/aug-cc-pVDZ (L1) and MP2/aug-cc-pVDZ (L2). Distances are in Å and angles are in degrees.

| Parameters    | TZ123-WIV |        | Parameters    | TZ124-WIV |        |
|---------------|-----------|--------|---------------|-----------|--------|
|               | L1        | L2     |               | L1        | L2     |
| N2-N1         | 1.327     | 1.343  | N2-N1         | 1.336     | 1.349  |
| N3-N2         | 1.327     | 1.342  | C3-N2         | 1.336     | 1.343  |
| C4-N3         | 1.342     | 1.348  | N4-C3         | 1.342     | 1.348  |
| C5-C4         | 1.389     | 1.390  | C5-N4         | 1.332     | 1.341  |
| C6-N1         | 1.342     | 1.348  | C6-N1         | 1.333     | 1.343  |
| H7-C4         | 1.087     | 1.087  | H7-C3         | 1.087     | 1.086  |
| H8-C5         | 1.087     | 1.087  | H8-C5         | 1.089     | 1.088  |
| H9-C6         | 1.087     | 1.087  | H9-C6         | 1.087     | 1.087  |
| O10-H8        | 2.226     | 2.186  | O10-H8        | 2.242     | 2.203  |
| H11-O10       | 0.970     | 0.973  | H11-O10       | 0.969     | 0.972  |
| H12-O10       | 0.970     | 0.973  | H12-O10       | 0.969     | 0.972  |
| N3-N2-N1      | 121.39    | 121.02 | C3-N2-N1      | 118.04    | 117.95 |
| C4-N3-N2      | 119.75    | 119.58 | N4-C3-N2      | 127.13    | 127.44 |
| C5-C4-N3      | 122.37    | 122.55 | C5-N4-C3      | 114.57    | 114.32 |
| C6-N1-N2      | 119.74    | 119.57 | C6-N1-N2      | 118.19    | 117.52 |
| H7-C4-N3      | 115.21    | 114.95 | H7-C3-N2      | 115.51    | 115.34 |
| H8-C5-C4      | 122.83    | 122.64 | H8-C5-N4      | 118.14    | 117.83 |
| H9-C6-N1      | 115.21    | 114.96 | H9-C6-N1      | 116.14    | 115.48 |
| O10-H8-C5     | 178.65    | 179.41 | O10-H8-C5     | 177.70    | 179.48 |
| H11-O10-H8    | 126.99    | 127.20 | H11-O10-H8    | 118.26    | 121.18 |
| H12-O10-H8    | 127.53    | 127.56 | H12-O10-H8    | 120.46    | 122.38 |
| C4-N3-N2-N1   | 0.0       | 0.0    | N4-C3-N2-N1   | 0.0       | 0.0    |
| C5-C4-N3-N2   | -0.0      | -0.0   | C5-N4-C3-N2   | -0.0      | 0.0    |
| C6-N1-N2-N3   | -0.0      | -0.0   | C6-N1-N2-C3   | -0.0      | -0.0   |
| H7-C4-N3-N2   | 180.0     | -180.0 | H7-C3-N2-N1   | -180.0    | -180.0 |
| H8-C5-C4-N3   | 180.0     | -180.0 | H8-C5-N4-C3   | -180.0    | -180.0 |
| H9-C6-N1-N2   | -180.0    | 180.0  | H9-C6-N1-N2   | 180.0     | 180.0  |
| O10-H8-C5-C4  | -102.4    | -102.1 | O10-H8-C5-C6  | -56.9     | -88.8  |
| H11-O10-H8-C5 | 12.6      | 11.5   | H11-O10-H8-C5 | -62.6     | -23.9  |
| H12-O10-H8-C5 | -167.7    | -167.8 | H12-O10-H8-C5 | 165.6     | -162.3 |

#### S4. REFERENCES

- [1] Carroll, M. T.; Chang, C.; Bader, R. F. W. Prediction of the structures of hydrogen-bonded complexes using the laplacian of the charge density. *Mol. Phys.* **1988**, *63*, 387-405.
- [2] Bader, R. F. W.; MacDougall, P. J.; Lau, C. D. H. Bonded and nonbonded charge concentrations and their relation to molecular geometry and reactivity. *J. Am. Chem. Soc.* **1984**, *106*, 1594-1605.
- [3] Bader, R. F. W.; Heard, G. L. The mapping of the conditional pair density onto the electron density. *J. Chem. Phys.* **1999**, *111*, 8789-8798.
